# Supplementary material for: Suppressed Recombination of Sex Chromosomes Is Not Caused by Chromosomal Reciprocal Translocation in Spiny Frog (Quasipaa boulengeri)
Source: Front Genet. 2018 Aug 27;9:288. doi: 10.3389/fgene.2018.00288 (PMC6119705; doi:10.3389/fgene.2018.00288)
Supplement: TABLE S1 — Populations, sexes, karyotypes, genotypes, cox1 and cytb sequences of all individuals. Seven individuals with possible sex reversal are highlighted (in red font). F, female; M, male. [file Table_1.XLSX]

## Sheet: sex-linked loci
Table S1 Populations, sexes, karyotypes, genotypes, cox1 and cytb sequences of all individuals. Seven individuals with possible sex reversal are highlighted (in red font). F = female; M = male.
Population	Individual	Sex	Karyotype	S4		S6		S26		S9		S10		B08
1-PZLMS	XM3937	F	IV	104	110	214	215	286	298	274	499	158	166	416	422
1-PZLMS	XM4273	F	IV	104	110	214	215	282	298	274	499	158	166	408	422
1-PZLMS	XM4275	F	V	104	110	214	215	286	298	274	499	158	166	416	422
1-PZLMS	XM4276	F	V	104	110	214	215	282	298	274	499	158	166	416	422
1-PZLMS	XM4277	F	V	104	110	214	215	282	298	274	499	158	166	408	422
1-PZLMS	XM4279	F	IV	104	110	214	215	282	298	274	499	158	166	416	422
1-PZLMS	XM5753	F	II	104	110	214	215	286	298	274	499	158	166	408	422
1-PZLMS	XM5755	F	II	104	110	214	215	282	298	274	499	158	166	416	422
1-PZLMS	XM5756	F	II	104	110	214	215	286	298	274	499	158	166	416	422
1-PZLMS	XM5758	F	II	104	110	214	215	286	298	274	499	158	166	408	422
1-PZLMS	XM5760	F	II	104	110	214	215	286	298	274	499	158	166	416	422
1-PZLMS	XM5761	F	IV	104	110	214	215	286	298	274	499	158	166	416	422
1-PZLMS	XM5763	F	II	104	110	214	215	286	298	274	499	158	166	416	422
1-PZLMS	XM5765	F	II	104	110	214	215	282	298	274	499	158	166	416	422
1-PZLMS	XM5762	F	I	110	110	214	214	282	282	274	274	158	158	408	416
1-PZLMS	XM4272	F	I	110	110	214	214	282	282	274	274	158	158	408	416
1-PZLMS	XM4274	M	V	104	107	211	215	298	322	268	499	146	166	388	422
1-PZLMS	XM4278	M	I	107	110	211	214	286	318	268	274	146	158	388	416
1-PZLMS	XM4282	M	I	107	110	211	214	298	322	268	274	146	158	388	416
1-PZLMS	XM5752	M	I	107	110	?	?	282	322	268	274	146	158	388	416
1-PZLMS	XM5754	M	I	107	110	211	214	282	318	268	274	146	158	388	416
1-PZLMS	XM5757	M	I	107	110	211	214	282	318	268	274	146	158	388	408
1-PZLMS	XM5759	M	I	107	110	211	214	282	322	268	274	146	158	388	416
1-PZLMS	XM5764	M	I	107	110	211	214	282	322	268	274	146	158	388	416
2-PZCF	XM2031	F	III	104	110	214	215	286	294	274	499	158	166	416	422
2-PZCF	XM4259	F	II	104	110	214	215	298	302	274	499	158	166	416	422
2-PZCF	XM4289	F	IV	104	110	214	215	282	294	274	499	158	166	416	422
2-PZCF	XM4295	F	IV	104	110	214	215	290	294	274	499	158	166	408	422
2-PZCF	XM4301	F	IV	104	110	214	215	286	294	274	499	158	166	416	422
2-PZCF	XM4286	F	I	110	110	214	214	286	290	274	274	158	158	416	416
2-PZCF	XM4290	F	I	110	110	214	214	286	290	274	274	158	158	408	416
2-PZCF	XM4291	F	I	110	110	214	214	286	310	274	274	158	158	416	416
2-PZCF	XM4298	F	I	110	110	214	214	286	310	274	274	158	158	416	416
2-PZCF	XM4311	F	I	110	110	214	214	282	294	274	274	158	158	408	416
2-PZCF	XM4313	F	I	110	110	214	214	290	290	274	274	158	158	416	416
2-PZCF	XM4261	M	IV	104	107	211	215	294	330	268	499	146	166	388	422
2-PZCF	XM4285	M	IV	104	107	211	215	294	318	268	499	146	166	388	422
2-PZCF	XM4288	M	IV	104	107	211	215	294	318	268	499	146	166	388	422
2-PZCF	XM4299	M	IV	104	107	211	215	294	318	268	499	146	166	388	422
2-PZCF	XM2028	M	I	107	110	211	214	290	330	268	274	146	158	388	408
2-PZCF	XM4297	M	I	107	110	211	214	286	318	268	274	146	158	388	416
2-PZCF	XM4300	M	I	107	110	211	214	290	318	268	274	146	158	388	416
2-PZCF	XM4302	M	I	107	110	211	214	286	322	268	274	146	158	388	416
2-PZCF	XM4303	M	I	107	110	211	214	278	322	268	274	146	158	388	416
2-PZCF	XM4304	M	I	107	110	211	214	290	318	268	274	146	158	388	408
2-PZCF	XM4305	M	I	107	110	211	214	286	318	268	274	146	158	388	408
2-PZCF	XM4283	M	I	107	110	211	214	310	322	268	274	146	158	388	416
2-PZCF	XM4284	M	I	107	110	211	214	310	318	268	274	146	158	388	416
2-PZCF	XM4292	M	I	107	110	211	214	310	318	268	274	146	158	388	416
2-PZCF	XM4287	M	I	107	110	211	214	286	322	268	274	146	158	388	416
2-PZCF	XM4293	M	I	107	110	211	214	282	318	268	274	146	158	388	416
2-PZCF	XM4294	M	I	107	110	211	214	290	318	268	274	146	158	388	408
2-PZCF	XM4296	M	I	107	110	211	214	286	318	268	274	146	158	388	416
2-PZCF	XM4306	M	I	107	110	211	214	286	322	268	274	146	158	388	408
2-PZCF	XM4307	M	I	107	110	211	214	290	322	268	274	146	158	388	408
2-PZCF	XM4308	M	I	107	110	211	214	282	318	268	274	146	158	388	416
2-PZCF	XM4309	M	I	107	110	211	214	290	322	268	274	146	158	388	408
2-PZCF	XM4310	M	I	107	110	211	214	286	322	268	274	146	158	388	416
2-PZCF	XM4312	M	I	107	110	211	214	282	322	268	274	146	158	388	416
3-QCS	XM4239	F	IV	104	110	214	215	294	298	274	499	158	166	416	422
3-QCS	XM4242	F	III	104	110	214	215	294	298	274	499	158	166	416	422
3-QCS	XM3743	F	IV	104	110	214	215	298	298	274	499	158	166	408	422
3-QCS	XM3744	F	IV	104	110	214	215	298	298	277	280	158	166	416	422
3-QCS	XM3746	F	IV	104	110	214	215	294	298	277	280	158	166	416	422
3-QCS	XM3747	F	IV	104	110	214	215	298	298	277	280	158	166	416	422
3-QCS	XM3749	F	IV	104	110	214	215	298	298	277	280	158	166	416	422
3-QCS	XM2934	F	IV	104	110	214	215	290	298	274	499	158	166	416	422
3-QCS	XM2940	F	IV	104	110	214	?	282	298	274	499	158	166	416	422
3-QCS	XM3075	F	IV	104	110	214	?	290	298	274	499	158	166	416	422
3-QCS	XM3482	F	IV	104	110	214	?	298	306	274	499	158	166	416	422
3-QCS	XM3486	F	IV	104	110	214	?	298	302	274	499	158	166	416	422
3-QCS	XM3745	F	I	110	110	214	214	298	302	280	280	158	158	416	416
3-QCS	XM3484	F	I	110	110	214	214	282	294	274	274	158	158	416	422
3-QCS	XM4238	M	IV	104	107	211	215	298	326	268	499	146	166	388	422
3-QCS	XM4240	M	III	104	107	211	215	298	326	268	499	146	166	388	422
3-QCS	XM3742	M	IV	104	110	214	215	298	302	280	499	158	166	416	422
3-QCS	XM3483	M	IV	104	107	211	215	?	?	268	499	146	166	388	422
3-QCS	XM3480	M	I	107	110	211	214	282	330	268	274	146	158	388	416
4-DYYEC	XM4201	F	IV	104	110	214	215	294	298	274	499	158	166	416	422
4-DYYEC	XM4203	F	IV	104	110	214	215	294	294	277	280	158	166	416	422
4-DYYEC	XM4205	F	IV	104	110	214	215	286	294	277	280	158	166	416	422
4-DYYEC	XM4213	F	IV	104	110	214	215	294	294	277	280	158	166	416	422
4-DYYEC	XM3664	F	IV	104	110	214	215	294	322	274	277	158	166	416	422
4-DYYEC	XM3667	F	IV	104	110	214	215	294	294	274	277	158	166	416	422
4-DYYEC	XM3670	F	IV	104	110	214	215	290	294	277	280	158	166	416	422
4-DYYEC	XM3675	F	IV	104	110	214	215	286	294	274	499	158	166	416	422
4-DYYEC	XM3684	F	IV	104	110	214	215	294	322	277	280	158	166	416	422
4-DYYEC	XM3767	F	IV	104	110	214	215	294	322	274	499	158	166	416	422
4-DYYEC	XM3665	F	III	104	110	214	215	290	294	277	280	158	166	416	422
4-DYYEC	XM3666	F	IV	104	110	214	215	290	294	277	280	158	166	416	422
4-DYYEC	XM3672	F	IV	104	110	214	215	294	306	274	499	158	166	416	422
4-DYYEC	XM3673	F	IV	104	110	214	215	286	294	277	280	158	166	416	422
4-DYYEC	XM3674	F	IV	104	110	214	215	286	294	277	280	158	166	416	422
4-DYYEC	XM3681	F	IV	104	110	214	215	286	294	277	280	158	166	416	422
4-DYYEC	XM3683	F	IV	104	110	214	215	294	322	274	499	158	166	416	422
4-DYYEC	XM3689	F	IV	104	110	214	215	290	294	277	280	158	166	416	422
4-DYYEC	XM3751	F	IV	104	110	214	215	286	294	280	499	158	166	416	422
4-DYYEC	XM3752	F	IV	104	110	214	215	294	306	274	499	158	166	416	422
4-DYYEC	XM3755	F	IV	104	110	214	215	294	294	280	499	158	166	416	422
4-DYYEC	XM3759	F	IV	104	110	214	215	294	322	280	499	158	166	416	422
4-DYYEC	XM3763	F	IV	104	110	214	215	290	294	274	499	158	166	416	422
4-DYYEC	XM3769	F	IV	104	110	214	215	294	294	280	499	158	166	416	422
4-DYYEC	XM4115	F	IV	104	110	214	215	290	294	280	499	158	166	416	422
4-DYYEC	XM4124	F	IV	104	110	214	215	290	294	280	499	158	166	416	422
4-DYYEC	XM4125	F	IV	104	110	214	215	290	294	274	499	158	166	416	422
4-DYYEC	XM4157	F	IV	104	110	214	215	290	294	280	499	158	166	416	422
4-DYYEC	XM4163	F	IV	104	110	214	215	286	294	274	499	158	166	416	422
4-DYYEC	XM4168	F	IV	104	110	214	215	294	294	280	499	158	166	416	422
4-DYYEC	XM4171	F	IV	104	110	214	215	286	294	274	499	158	166	416	422
4-DYYEC	XM4181	F	IV	104	110	214	215	290	294	274	499	158	166	416	422
4-DYYEC	XM3716	F	I	110	110	214	214	294	322	280	280	158	158	416	416
4-DYYEC	XM3668	F	I	110	110	214	214	286	298	280	280	158	158	416	416
4-DYYEC	XM3671	F	I	110	110	214	214	294	322	274	280	158	158	416	416
4-DYYEC	XM3682	F	I	110	110	214	214	290	294	274	274	158	158	416	416
4-DYYEC	XM3687	F	I	110	110	214	214	294	306	274	280	158	158	416	416
4-DYYEC	XM4158	F	I	110	110	214	214	290	294	274	280	?	?	416	416
4-DYYEC	XM4160	F	I	110	110	214	214	290	298	274	277	158	158	416	416
4-DYYEC	XM4166	F	I	110	110	214	214	286	286	274	274	158	158	416	416
4-DYYEC	XM4167	F	I	110	110	214	214	294	294	274	280	158	158	416	416
4-DYYEC	XM4169	F	I	110	110	214	214	286	294	274	274	158	158	416	416
4-DYYEC	XM4180	F	I	110	110	214	214	290	290	274	280	158	158	416	416
4-DYYEC	XM3669	F	I	110	110	214	214	298	322	280	280	158	158	416	416
4-DYYEC	XM3676	F	I	110	110	214	214	322	322	274	280	158	158	416	416
4-DYYEC	XM3677	F	I	110	110	214	214	282	322	274	280	158	158	416	416
4-DYYEC	XM3678	F	I	110	110	214	214	290	302	274	280	158	158	416	416
4-DYYEC	XM3679	F	I	110	110	214	214	282	290	274	274	158	158	416	416
4-DYYEC	XM3680	F	I	110	110	214	214	286	290	280	280	158	158	416	416
4-DYYEC	XM3750	F	I	110	110	214	214	294	322	274	274	158	158	416	416
4-DYYEC	XM3754	F	I	110	110	214	214	290	294	280	280	158	158	416	416
4-DYYEC	XM3757	F	I	110	110	214	214	286	290	274	280	158	158	416	416
4-DYYEC	XM3758	F	I	110	110	214	214	290	298	274	280	158	158	416	416
4-DYYEC	XM3760	F	I	110	110	214	214	322	326	274	280	158	158	416	416
4-DYYEC	XM3762	F	I	110	110	214	214	306	322	280	280	158	158	416	416
4-DYYEC	XM3768	F	I	110	110	214	214	286	286	280	280	158	158	416	416
4-DYYEC	XM3771	F	I	110	110	214	214	322	322	274	280	158	158	416	416
4-DYYEC	XM3772	F	I	110	110	214	214	286	294	274	280	158	158	416	416
4-DYYEC	XM3773	F	I	110	110	214	214	286	286	274	280	158	158	416	416
4-DYYEC	XM3774	F	I	110	110	214	214	286	294	274	280	158	158	416	416
4-DYYEC	XM3775	F	I	110	110	214	214	286	294	274	280	158	158	416	416
4-DYYEC	XM3776	F	I	110	110	214	214	290	330	274	280	158	158	416	416
4-DYYEC	XM3778	F	I	110	110	214	214	290	290	274	280	158	158	416	416
4-DYYEC	XM4119	F	I	110	110	214	214	286	294	274	283	158	158	416	416
4-DYYEC	XM4126	F	I	110	110	214	214	290	294	274	280	158	158	416	416
4-DYYEC	XM4175	F	I	110	110	214	214	286	294	274	280	158	158	416	416
4-DYYEC	XM4179	F	I	110	110	214	214	290	294	274	280	158	158	416	422
4-DYYEC	XM4194	F	I	110	110	214	214	290	290	274	280	158	158	416	416
4-DYYEC	XM4202	M	IV	104	107	211	215	294	322	268	499	146	166	388	422
4-DYYEC	XM4209	M	IV	104	107	211	215	294	322	268	499	146	166	388	422
4-DYYEC	XM3685	M	IV	104	107	211	215	294	294	268	499	146	166	388	422
4-DYYEC	XM3686	M	IV	104	107	211	215	294	334	268	277	146	166	388	422
4-DYYEC	XM3691	M	IV	?	?	?	?	?	?	?	?	?	?	388	422
4-DYYEC	XM3764	M	IV	104	107	214	215	290	294	268	277	146	166	388	422
4-DYYEC	XM4172	M	IV	104	107	211	215	294	322	268	499	146	166	388	422
4-DYYEC	XM3761	M	IV	104	107	211	215	294	366	268	499	146	166	388	422
4-DYYEC	XM4121	M	IV	104	107	211	215	294	294	268	499	146	166	388	422
4-DYYEC	XM4177	M	IV	104	107	211	215	294	322	268	499	146	166	388	422
4-DYYEC	XM3712	M	I	107	110	211	214	286	358	268	274	146	158	388	416
4-DYYEC	XM3688	M	I	?	?	?	?	?	?	?	?	?	?	388	416
4-DYYEC	XM3690	M	I	107	110	211	214	322	362	268	274	146	158	388	416
4-DYYEC	XM3692	M	I	107	110	211	214	322	330	268	499	146	158	388	416
4-DYYEC	XM3766	M	I	?	?	211	214	?	?	?	?	?	?	388	416
4-DYYEC	XM3770	M	I	107	110	211	214	322	362	268	499	146	158	388	416
4-DYYEC	XM3777	M	I	?	?	?	?	?	?	268	274	?	?	388	416
4-DYYEC	XM4116	M	I	107	110	211	214	290	330	268	280	146	158	388	416
4-DYYEC	XM4117	M	I	107	110	211	214	294	326	268	280	146	158	388	416
4-DYYEC	XM4118	M	I	107	110	211	214	290	330	268	280	146	158	388	416
4-DYYEC	XM4120	M	I	107	110	211	214	294	326	268	280	146	158	388	416
4-DYYEC	XM4122	M	I	107	110	211	214	294	330	268	274	146	158	388	416
4-DYYEC	XM4123	M	I	107	110	211	214	290	350	268	280	146	158	388	416
4-DYYEC	XM4127	M	I	107	110	211	214	290	326	268	280	146	158	388	416
4-DYYEC	XM4128	M	I	107	110	211	214	290	350	268	274	146	158	388	416
4-DYYEC	XM4159	M	I	107	110	211	214	290	330	268	280	146	158	388	416
4-DYYEC	XM4162	M	I	107	110	211	214	290	350	268	274	146	158	388	416
4-DYYEC	XM4165	M	I	107	110	211	214	290	330	268	280	146	158	388	416
4-DYYEC	XM4170	M	I	107	110	211	214	294	322	268	280	146	158	388	416
4-DYYEC	XM4173	M	I	107	110	211	214	286	322	268	280	146	158	388	416
4-DYYEC	XM4174	M	I	107	110	211	214	294	322	268	280	146	158	388	416
4-DYYEC	XM3753	M	I	107	110	211	214	290	326	268	280	146	158	388	416
4-DYYEC	XM3756	M	I	107	110	211	214	322	366	268	280	146	158	388	416
4-DYYEC	XM3765	M	I	107	110	211	214	290	330	268	280	146	158	388	416
4-DYYEC	XM4129	M	I	107	110	211	214	286	330	268	274	146	158	388	416
4-DYYEC	XM4130	M	I	107	110	211	214	290	330	268	280	146	158	388	416
4-DYYEC	XM4161	M	I	107	110	211	214	290	330	268	280	146	158	388	416
4-DYYEC	XM4164	M	I	107	110	211	214	290	322	268	280	146	158	388	416
4-DYYEC	XM4176	M	I	107	110	211	214	286	322	268	274	146	158	388	416
4-DYYEC	XM4178	M	I	107	110	211	214	290	350	268	280	146	158	388	416
5-DYGTS	XM4061	F	IV	104	110	214	214	290	294	274	499	158	166	416	422
5-DYGTS	XM4063	F	IV	104	110	214	214	290	298	274	499	158	166	416	422
5-DYGTS	XM4064	F	IV	104	110	214	214	290	298	274	499	158	166	416	422
5-DYGTS	XM4065	F	IV	104	110	214	214	282	294	274	499	158	166	416	422
5-DYGTS	XM4066	F	IV	104	110	214	214	282	298	274	499	158	166	416	422
5-DYGTS	XM4067	F	IV	104	110	214	215	290	298	274	499	158	166	416	422
5-DYGTS	XM4096	F	IV	104	110	214	214	286	298	274	499	158	166	416	422
5-DYGTS	XM3007	F	IV	104	110	214	215	298	302	274	499	158	166	416	422
5-DYGTS	XM3008	F	IV	104	110	214	215	286	298	274	499	158	166	416	422
5-DYGTS	XM3010	F	IV	104	110	?	?	298	298	?	?	158	166	416	422
5-DYGTS	XM3382	F	IV	104	110	214	215	282	298	274	499	158	166	416	422
5-DYGTS	XM3384	F	IV	104	110	214	214	282	298	274	499	158	166	416	422
5-DYGTS	XM3629	F	IV	104	110	214	214	282	298	274	499	158	166	416	422
5-DYGTS	XM3631	F	IV	104	110	214	214	282	298	274	499	158	166	416	422
5-DYGTS	XM3632	F	IV	104	110	214	215	286	298	274	499	158	166	416	422
5-DYGTS	XM3634	F	IV	104	110	214	214	286	298	274	499	158	166	416	422
5-DYGTS	XM3635	F	IV	104	110	214	215	286	298	274	499	158	166	416	422
5-DYGTS	XM3636	F	IV	104	110	214	214	290	298	274	499	158	166	416	422
5-DYGTS	XM3637	F	IV	104	110	214	214	286	298	274	499	158	166	416	422
5-DYGTS	XM3638	F	IV	104	110	214	214	286	298	274	499	158	166	416	422
5-DYGTS	XM3641	F	IV	104	110	214	214	282	298	274	499	158	166	416	422
5-DYGTS	XM3642	F	IV	104	110	214	214	282	298	274	499	158	166	416	422
5-DYGTS	XM3649	F	IV	104	110	214	214	282	298	274	499	158	166	416	422
5-DYGTS	XM3650	F	IV	104	110	214	214	282	298	274	499	158	166	416	422
5-DYGTS	XM3701	F	IV	104	110	214	214	286	298	274	499	158	166	416	422
5-DYGTS	XM3733	F	IV	104	110	214	214	286	298	274	499	158	166	416	422
5-DYGTS	XM3515	M	IV	?	?	?	?	?	?	?	?	?	?	416	422
5-DYGTS	XM3028	M	IV	104	110	214	215	286	298	274	499	158	166	416	422
5-DYGTS	XM3383	M	IV	104	107	211	215	298	322	268	499	146	166	388	422
5-DYGTS	XM3385	M	IV	104	107	211	215	298	322	268	499	146	166	388	422
5-DYGTS	XM3630	M	IV	104	107	211	215	298	322	268	499	146	166	388	422
5-DYGTS	XM3633	M	IV	104	110	214	215	286	298	274	499	158	166	416	422
5-DYGTS	XM3639	M	IV	104	107	211	215	298	322	268	499	146	166	388	422
5-DYGTS	XM3640	M	IV	104	107	211	215	298	322	268	499	146	166	388	422
5-DYGTS	XM3662	M	IV	104	107	211	215	298	322	268	499	146	166	388	422
5-DYGTS	XM3702	M	IV	104	107	211	215	298	322	268	499	146	166	388	422
5-DYGTS	XM3512	M	I	107	110	211	214	298	314	268	274	146	158	388	416
6-QLDZ	XM3917	F	I	104	110	211	215	290	298	274	499	158	166	416	422
6-QLDZ	XM3905	F	I	104	110	211	215	290	298	274	499	158	166	416	422
6-QLDZ	XM3906	F	I	104	110	214	214	282	290	274	499	158	166	416	422
6-QLDZ	XM3907	F	I	104	110	211	215	290	298	274	499	158	166	416	422
6-QLDZ	XM3909	F	I	104	110	211	215	282	290	274	499	160	166	416	422
6-QLDZ	XM3911	F	I	104	110	214	214	290	294	274	499	160	166	416	422
6-QLDZ	XM3912	F	I	104	110	211	215	290	298	274	499	158	166	416	422
6-QLDZ	XM3914	F	I	104	110	214	214	282	290	274	499	158	166	416	422
6-QLDZ	XM3915	F	I	104	110	211	215	290	298	274	499	158	166	416	422
6-QLDZ	XM3916	F	I	104	110	211	215	290	298	274	499	158	166	416	422
6-QLDZ	XM3918	F	I	104	110	211	215	282	290	274	499	160	166	416	422
6-QLDZ	XM3919	F	I	104	110	214	214	282	290	274	499	158	166	416	422
6-QLDZ	XM3920	F	I	104	110	214	214	282	290	274	499	160	166	416	422
6-QLDZ	XM3921	F	I	104	110	214	214	282	290	274	499	160	166	416	422
6-QLDZ	XM3922	F	I	104	110	214	214	282	290	274	499	158	166	416	422
6-QLDZ	XM3926	F	I	104	110	211	215	290	294	274	499	160	166	416	422
6-QLDZ	XM3929	F	I	104	110	211	215	290	298	274	499	158	166	416	422
6-QLDZ	XM3930	F	I	104	110	214	214	282	290	274	499	160	166	416	422
6-QLDZ	XM3932	F	I	104	110	214	214	282	290	274	499	158	166	416	422
6-QLDZ	XM3933	F	I	104	110	214	214	282	290	274	499	158	166	416	422
6-QLDZ	XM3935	F	I	104	110	214	214	282	290	274	499	160	166	416	422
6-QLDZ	XM3952	F	I	104	110	214	214	282	290	274	499	160	166	416	422
6-QLDZ	XM3953	F	I	110	110	211	214	282	290	274	277	158	160	416	416
6-QLDZ	XM3954	F	I	104	110	214	214	282	290	274	499	160	166	416	422
6-QLDZ	XM3959	F	I	104	110	?	?	?	?	274	277	160	166	416	422
6-QLDZ	XM3965	F	I	104	110	214	214	282	290	274	277	160	166	416	422
6-QLDZ	XM3966	F	I	104	110	214	214	282	290	274	499	158	160	416	422
6-QLDZ	XM3968	F	I	110	110	211	214	282	290	274	499	158	160	416	416
6-QLDZ	XM3969	F	I	110	110	214	214	282	282	274	280	158	160	416	416
6-QLDZ	XM3973	F	I	104	110	214	214	282	290	274	499	160	166	416	422
6-QLDZ	XM3974	F	I	110	110	211	214	298	298	274	274	158	158	416	416
6-QLDZ	XM3976	F	I	110	110	211	211	290	290	274	277	158	160	416	416
6-QLDZ	XM3977	F	I	104	110	214	214	282	290	274	499	158	166	416	422
6-QLDZ	XM3978	F	I	104	110	211	215	290	290	277	499	158	166	416	422
6-QLDZ	XM3979	F	I	104	110	214	214	282	290	274	499	160	166	416	422
6-QLDZ	XM3980	F	I	110	110	211	214	282	290	274	277	158	160	416	416
6-QLDZ	XM3982	F	I	104	110	211	215	290	298	274	499	158	166	416	422
6-QLDZ	XM3984	F	I	110	110	214	214	282	282	274	274	160	160	416	416
6-QLDZ	XM3985	F	I	104	110	214	214	282	290	274	499	160	166	416	422
6-QLDZ	XM3986	F	I	110	110	211	214	282	290	?	?	158	160	416	416
6-QLDZ	XM3987	F	I	110	110	214	214	282	282	?	?	158	160	416	416
6-QLDZ	XM3964	M	I	104	107	211	215	290	314	268	499	146	166	388	422
6-QLDZ	XM3908	M	I	104	116	214	214	282	290	274	499	160	166	416	422
6-QLDZ	XM3910	M	I	107	110	211	214	282	294	268	274	146	160	386	416
6-QLDZ	XM3923	M	I	107	110	211	211	282	294	268	274	146	160	386	416
6-QLDZ	XM3951	M	I	107	110	211	214	282	294	268	274	146	160	386	416
6-QLDZ	XM3967	M	I	107	110	211	214	294	294	268	274	146	160	386	416
6-QLDZ	XM3971	M	I	107	110	211	214	282	294	268	274	146	160	386	416
6-QLDZ	XM3972	M	I	107	110	211	214	282	294	268	274	146	160	386	416
6-QLDZ	XM3975	M	I	107	110	211	214	282	294	268	274	146	160	386	416
7-QLTTS	XM3643	F	II	104	110	214	215	290	290	277	280	158	166	416	422
7-QLTTS	QLY378	F	IV	104	110	214	215	286	294	274	499	158	166	416	422
7-QLTTS	QLY385	F	V	104	110	214	215	286	298	274	499	158	166	416	422
7-QLTTS	QLY387	F	V	104	110	214	215	286	298	274	499	158	166	416	422
7-QLTTS	XM3590	F	V	?	?	?	?	?	?	?	?	?	?	416	422
7-QLTTS	XM3623	F	IV	104	110	211	215	286	290	274	499	158	166	416	422
7-QLTTS	XM3625	F	II	104	110	214	215	282	290	274	499	158	166	416	422
7-QLTTS	XM4147	F	IV	104	113	211	215	278	294	280	499	158	166	416	422
7-QLTTS	XM4149	F	II	110	113	214	214	286	294	274	499	158	158	408	416
7-QLTTS	XM4152	F	II	104	110	211	215	290	294	274	499	158	166	416	422
7-QLTTS	XM4153	F	II	104	110	214	215	290	294	274	499	158	166	416	422
7-QLTTS	XM4154	F	II	104	110	214	215	286	294	274	499	158	166	416	422
7-QLTTS	QLY379	F	I	?	?	214	215	?	?	?	?	158	158	416	416
7-QLTTS	QLY388	F	I	104	113	214	215	282	294	280	499	158	166	416	422
7-QLTTS	QLY390	F	I	110	113	211	214	282	290	274	280	158	158	416	416
7-QLTTS	QLY391	F	I	113	116	211	214	294	298	280	283	158	158	416	416
7-QLTTS	XM3591	F	I	110	113	211	214	294	294	274	280	158	158	416	416
7-QLTTS	XM3598	F	I	104	110	214	215	290	294	274	499	158	166	416	422
7-QLTTS	XM3599	F	I	113	116	211	214	294	298	280	283	158	158	416	416
7-QLTTS	XM3600	F	I	104	110	211	215	294	298	277	280	158	166	416	422
7-QLTTS	XM3601	F	I	104	113	211	215	290	298	274	499	158	166	416	422
7-QLTTS	XM3620	F	I	104	113	211	215	290	294	274	274	158	166	416	422
7-QLTTS	XM3621	F	I	104	110	214	215	290	302	277	280	158	166	416	422
7-QLTTS	XM3622	F	I	110	110	214	214	290	294	274	274	158	158	416	416
7-QLTTS	XM3624	F	I	104	110	214	215	290	294	274	274	158	166	416	422
7-QLTTS	XM3626	F	I	113	113	211	211	298	298	274	274	158	158	416	416
7-QLTTS	XM4139	F	I	110	116	214	214	286	294	274	274	158	158	416	416
7-QLTTS	XM4141	F	I	110	113	211	214	278	294	274	280	158	158	416	416
7-QLTTS	XM4143	F	I	113	113	211	211	278	278	280	280	158	158	416	416
7-QLTTS	XM4145	F	I	110	113	211	214	278	294	274	280	158	158	416	416
7-QLTTS	XM4148	F	I	110	113	211	214	294	298	274	280	158	158	416	416
7-QLTTS	XM4151	F	I	104	113	211	215	294	294	274	499	158	166	416	422
7-QLTTS	QLY386	F	I	104	113	211	215	278	290	280	499	158	166	416	422
7-QLTTS	XM3619	M	IV	104	107	211	215	290	306	268	277	146	166	386	422
7-QLTTS	XM4142	M	IV	104	107	211	215	290	306	268	277	146	166	386	422
7-QLTTS	XM4146	M	III	104	107	211	215	294	306	268	499	146	166	386	422
7-QLTTS	XM3602	M	I	110	113	211	214	298	318	268	280	146	158	388	416
7-QLTTS	QLY380	M	I	107	110	211	214	290	330	268	274	146	158	388	416
7-QLTTS	QLY381	M	I	107	110	211	214	298	306	268	274	146	158	386	416
7-QLTTS	QLY382	M	I	107	110	211	214	290	306	268	274	146	158	386	416
7-QLTTS	QLY383	M	I	107	110	211	214	290	306	268	274	146	158	386	416
7-QLTTS	QLY384	M	I	107	110	211	214	294	306	268	277	146	158	386	416
7-QLTTS	QLY389	M	I	107	113	211	211	282	294	268	274	146	158	386	416
7-QLTTS	XM3603	M	I	104	107	211	215	294	302	268	499	146	166	386	422
7-QLTTS	XM3614	M	I	107	110	211	214	294	306	268	274	146	158	386	416
7-QLTTS	XM3615	M	I	107	113	211	214	298	306	268	280	146	158	386	416
7-QLTTS	XM3616	M	I	107	110	211	214	290	306	268	274	146	158	386	416
7-QLTTS	XM3617	M	I	107	113	211	211	278	306	268	280	146	158	386	416
7-QLTTS	XM3618	M	I	107	110	211	214	286	306	268	274	146	158	386	416
7-QLTTS	XM3627	M	I	104	107	211	215	290	294	268	499	146	166	386	422
7-QLTTS	XM4137	M	I	107	113	211	211	278	294	268	280	146	158	386	416
7-QLTTS	XM4140	M	I	107	113	211	211	278	306	268	280	146	158	386	416
7-QLTTS	XM4144	M	I	107	110	211	214	294	306	268	274	146	158	388	422
7-QLTTS	XM4150	M	I	107	113	211	211	294	334	268	280	146	158	388	416
8-EMPX	XM3800	F	I	104	110	214	215	294	314	283	499	158	166	416	422
8-EMPX	XM3803	F	I	104	110	214	215	290	306	274	499	158	166	416	422
8-EMPX	XM3804	F	I	104	110	214	215	294	310	283	499	158	166	416	422
8-EMPX	XM3808	F	I	104	110	214	215	282	314	283	499	158	166	416	422
8-EMPX	XM3809	F	I	104	110	214	215	282	314	283	499	158	166	416	422
8-EMPX	XM3812	F	I	104	110	214	215	278	310	283	499	158	166	416	422
8-EMPX	XM3813	F	I	104	113	214	215	290	310	274	499	158	166	416	422
8-EMPX	XM3818	F	I	104	110	214	215	282	314	283	499	158	166	416	422
8-EMPX	XM3821	F	I	104	107	215	220	314	322	268	499	146	166	388	422
8-EMPX	XM4133	F	I	104	110	215	220	282	310	277	283	158	166	416	422
8-EMPX	XM4134	F	I	104	110	214	215	290	310	283	499	158	166	416	422
8-EMPX	XM4232	F	I	104	110	215	220	286	310	283	499	158	166	416	422
8-EMPX	XM4235	F	I	104	107	215	220	314	326	268	499	146	166	388	422
8-EMPX	XM4237	F	I	104	110	214	215	290	298	274	499	158	166	416	422
8-EMPX	XM3791	F	III	104	110	214	215	274	322	274	499	158	166	416	422
8-EMPX	XM3827	F	IV	104	113	214	215	278	298	274	499	158	158	416	422
8-EMPX	XM3824	F	I	104	110	214	215	294	306	274	499	158	166	416	422
8-EMPX	XM3080	F	I	110	110	214	214	294	294	274	283	158	158	416	416
8-EMPX	XM3799	F	I	110	110	214	220	286	294	274	283	158	158	416	416
8-EMPX	XM3814	F	I	110	110	220	220	286	298	283	283	158	158	416	416
8-EMPX	XM3816	F	I	110	110	220	220	298	302	283	283	158	158	416	416
8-EMPX	XM3817	F	I	110	110	214	214	282	282	283	283	158	158	416	416
8-EMPX	XM3820	F	I	110	110	214	214	282	282	283	283	158	158	416	416
8-EMPX	XM3822	F	I	110	113	214	220	290	290	274	283	158	158	416	416
8-EMPX	XM3825	F	I	110	110	214	220	294	298	274	283	158	158	416	416
8-EMPX	XM4233	F	I	110	110	214	214	286	286	274	274	158	158	416	416
8-EMPX	XM4236	F	I	110	110	214	214	286	302	274	274	158	158	416	416
8-EMPX	XM3810	M	I	104	107	215	220	310	326	268	499	146	166	388	422
8-EMPX	XM3815	M	I	104	107	215	220	314	326	268	499	146	166	388	422
8-EMPX	XM4231	M	I	104	107	215	220	306	326	268	499	146	166	388	422
8-EMPX	XM4234	M	I	104	107	215	220	314	326	268	499	146	166	388	422
8-EMPX	XM3801	M	I	107	110	214	214	290	294	268	283	146	158	388	416
8-EMPX	XM3802	M	I	107	110	220	220	298	314	268	274	146	158	388	416
8-EMPX	XM3805	M	I	107	110	220	220	298	318	268	283	146	158	388	416
8-EMPX	XM3806	M	I	107	113	220	220	282	330	268	274	146	158	388	416
8-EMPX	XM3811	M	I	107	110	220	220	298	314	268	283	146	158	388	416
8-EMPX	XM3819	M	I	107	110	220	220	290	326	268	274	146	158	388	416
8-EMPX	XM3823	M	I	107	110	220	220	302	318	268	283	146	158	388	416
8-EMPX	XM3826	M	I	107	110	214	220	294	326	268	283	146	158	388	416
9-DGTX	XM6681	F	I	104	107	214	220	286	314	253	253	146	166	422	422
9-DGTX	XM6682	F	I	119	119	220	220	310	314	253	253	146	146	402	402
9-DGTX	XM6737	F	I	104	104	214	220	298	322	253	253	146	166	422	422
9-DGTX	XM6738	F	I	104	107	220	220	286	358	253	253	146	166	396	422
9-DGTX	XM6739	F	I	122	131	214	220	306	318	253	253	146	146	402	428
9-DGTX	XM6741	F	I	104	107	220	220	286	346	253	253	146	166	396	422
9-DGTX	XM6742	F	I	107	107	220	220	314	314	253	253	146	146	408	422
9-DGTX	XM6743	F	I	107	119	214	220	314	314	253	253	146	146	422	428
9-DGTX	XM6744	F	I	104	122	220	220	302	318	253	253	146	166	422	422
9-DGTX	XM6746	F	I	107	134	214	220	318	322	253	253	146	146	422	424
9-DGTX	XM6749	F	I	119	122	220	220	306	314	253	253	146	146	402	426
9-DGTX	XM6750	F	I	119	119	214	220	318	318	253	253	146	146	426	428
9-DGTX	XM6753	F	I	122	134	220	220	306	318	253	253	146	146	426	426
9-DGTX	XM6755	F	I	119	131	220	220	310	314	253	253	146	146	418	424
9-DGTX	XM6757	F	I	122	122	220	220	298	298	253	253	146	146	422	422
9-DGTX	XM6758	F	I	122	134	220	220	310	318	253	253	146	146	400	424
9-DGTX	XM6760	F	I	119	122	220	220	298	306	253	253	146	146	390	402
9-DGTX	XM6761	F	I	122	131	220	220	314	314	253	253	146	146	402	426
9-DGTX	XM6764	F	I	104	122	214	220	286	318	253	253	146	166	422	426
9-DGTX	XM6765	F	I	122	122	220	220	298	298	253	253	146	146	422	422
9-DGTX	XM6766	F	I	122	122	220	220	298	298	253	253	146	146	422	428
9-DGTX	XM6769	F	I	119	119	220	220	298	310	253	253	146	146	402	412
9-DGTX	XM6774	F	I	107	119	220	220	302	318	253	253	146	146	402	426
9-DGTX	XM6775	F	I	104	104	220	220	306	310	253	253	146	146	420	424
9-DGTX	XM6779	F	I	104	122	214	220	302	310	253	253	146	166	402	422
9-DGTX	XM6781	F	I	122	122	220	220	306	314	253	253	146	146	422	422
9-DGTX	XM6783	F	I	122	122	220	220	318	318	253	253	146	146	414	418
9-DGTX	XM6784	F	I	119	122	220	220	314	318	253	253	146	146	390	402
9-DGTX	XM6740	M	I	122	131	214	220	302	322	253	253	146	146	420	424
9-DGTX	XM6679	M	I	122	128	220	220	314	322	253	253	146	146	402	420
9-DGTX	XM6680	M	I	122	128	220	220	314	326	253	253	146	146	414	420
9-DGTX	XM6745	M	I	104	131	220	220	302	322	253	253	146	166	412	422
9-DGTX	XM6747	M	I	107	131	214	220	318	350	253	253	146	146	396	402
9-DGTX	XM6748	M	I	104	131	220	220	286	322	253	253	146	166	422	422
9-DGTX	XM6751	M	I	107	122	220	220	318	346	253	253	146	146	396	402
9-DGTX	XM6752	M	I	122	131	220	220	310	326	253	253	146	146	402	420
9-DGTX	XM6754	M	I	122	131	220	220	310	330	253	253	146	146	420	426
9-DGTX	XM6756	M	I	119	131	220	220	318	326	253	253	146	146	418	420
9-DGTX	XM6759	M	I	131	131	220	220	306	322	253	253	146	146	420	424
9-DGTX	XM6762	M	I	107	122	220	220	310	338	253	253	146	146	402	428
9-DGTX	XM6763	M	I	107	107	220	220	318	354	253	253	140	146	396	422
9-DGTX	XM6767	M	I	107	119	220	220	310	354	250	250	146	146	396	396
9-DGTX	XM6768	M	I	107	119	220	220	310	354	253	253	146	146	396	428
9-DGTX	XM6773	M	I	119	131	220	220	310	322	253	253	146	146	420	426
9-DGTX	XM6776	M	I	107	122	220	220	306	346	253	253	146	146	396	426
9-DGTX	XM6777	M	I	119	131	220	220	310	322	253	253	146	146	420	424
9-DGTX	XM6778	M	I	122	128	220	220	306	322	253	253	146	146	420	420
9-DGTX	XM6780	M	I	122	131	220	220	318	330	253	253	146	146	420	432
9-DGTX	XM6782	M	I	107	119	220	220	318	346	253	253	146	146	396	402
10-SYKKS	XM3392	F	I	104	104	214	220	306	326	268	271	134	142	422	422
10-SYKKS	XM3394	F	I	104	107	211	220	302	314	262	268	164	166	422	422
10-SYKKS	XM3395	F	I	104	104	211	220	298	302	262	268	164	166	422	422
10-SYKKS	XM3398	F	I	104	104	220	220	298	298	271	271	120	176	422	422
10-SYKKS	XM3399	F	I	104	104	211	214	298	314	268	268	164	166	422	422
10-SYKKS	XM3404	F	I	104	104	211	214	302	314	262	268	164	166	422	422
10-SYKKS	XM3405	F	I	104	107	211	214	298	314	262	268	134	166	422	422
10-SYKKS	XM3415	F	I	104	107	211	220	298	306	253	262	134	166	422	422
10-SYKKS	XM3420	F	I	101	107	220	223	314	322	268	274	158	166	422	422
10-SYKKS	XM3421	F	I	104	104	211	220	302	306	262	262	164	166	422	422
10-SYKKS	XM3422	F	I	101	104	220	223	302	314	268	268	164	166	422	422
10-SYKKS	XM3393	M	I	104	104	220	220	310	386	268	274	142	160	422	422
10-SYKKS	XM3396	M	I	104	104	220	223	310	310	268	274	134	164	422	424
10-SYKKS	XM3397	M	I	104	104	211	220	302	386	262	274	164	166	422	422
10-SYKKS	XM3400	M	I	104	104	220	220	314	386	268	268	158	166	422	422
10-SYKKS	XM3401	M	I	104	104	220	220	286	306	268	268	156	158	422	424
10-SYKKS	XM3402	M	I	104	104	220	220	302	386	268	274	166	166	422	422
10-SYKKS	XM3403	M	I	104	104	211	220	302	302	262	274	164	166	422	424
10-SYKKS	XM3406	M	I	104	107	220	220	310	310	274	274	142	158	422	424
10-SYKKS	XM3408	M	I	104	107	220	220	306	306	253	274	142	158	422	424
10-SYKKS	XM3409	M	I	101	104	220	220	322	322	268	274	158	166	422	424
10-SYKKS	XM3410	M	I	104	104	211	220	298	298	262	274	164	166	422	424
10-SYKKS	XM3411	M	I	104	104	211	220	298	386	262	274	164	166	422	422
10-SYKKS	XM3412	M	I	104	104	211	220	302	302	262	274	164	166	422	424
10-SYKKS	XM3413	M	I	104	107	220	220	314	314	274	274	158	166	422	424
10-SYKKS	XM3414	M	I	104	107	220	220	306	306	253	274	158	166	422	424
10-SYKKS	XM3416	M	I	104	104	220	220	302	302	268	274	142	166	422	424
10-SYKKS	XM3417	M	I	104	104	220	223	310	310	268	274	158	164	422	424
10-SYKKS	XM3418	M	I	104	104	214	220	298	298	268	274	158	158	422	424
10-SYKKS	XM3419	M	I	104	107	220	223	314	386	268	274	134	170	422	422
10-SYKKS	XM3423	M	I	104	107	214	220	314	314	268	274	134	158	422	424
11-ZYST	YSQ950	F	I	110	113	220	220	314	330	268	268	134	134	422	422
11-ZYST	YSQ951	F	I	104	104	220	220	310	326	265	286	142	160	422	422
11-ZYST	YSQ953	F	I	104	104	220	220	310	326	265	286	160	160	422	422
11-ZYST	YSQ954	F	I	110	113	220	220	314	314	268	268	134	134	422	422
11-ZYST	YSQ957	F	I	104	113	220	220	314	314	286	286	142	158	422	422
11-ZYST	YSQ958	F	I	104	104	220	220	310	310	256	256	136	160	422	422
11-ZYST	YSQ959	F	I	104	113	220	220	310	310	265	286	158	158	422	422
11-ZYST	YSQ960	F	I	104	104	220	220	318	318	265	286	158	158	422	422
11-ZYST	YSQ961	F	I	104	104	220	220	314	314	256	256	136	160	422	422
11-ZYST	YSQ963	F	I	104	113	220	220	314	322	265	268	158	158	422	422
11-ZYST	YSQ952	M	I	104	110	220	220	310	330	265	274	134	158	422	422
11-ZYST	YSQ955	M	I	104	110	220	220	310	310	265	268	134	160	422	422
11-ZYST	YSQ956	M	I	104	110	220	220	314	314	268	289	134	158	422	422
11-ZYST	YSQ962	M	I	104	110	220	220	314	314	256	265	158	158	422	422
12-GDYX	YSQ846	F	I	104	113	214	215	282	282	274	274	158	166	416	422
12-GDYX	YSQ847	F	I	104	113	214	215	?	?	274	274	158	166	416	422
12-GDYX	YSQ906	F	I	104	104	220	220	310	338	274	274	134	158	372	422
12-GDYX	YSQ907	F	I	104	104	220	220	286	326	256	256	134	134	422	422
12-GDYX	YSQ913	F	I	104	104	220	220	298	326	259	259	120	134	416	416
12-GDYX	YSQ914	F	I	104	104	220	220	286	326	256	274	120	164	422	422
12-GDYX	YSQ917	F	I	104	104	220	220	298	298	259	259	120	142	376	390
12-GDYX	YSQ921	F	I	104	104	220	220	286	330	259	259	146	166	412	412
12-GDYX	YSQ925	F	I	104	104	220	220	290	302	274	274	164	164	422	422
12-GDYX	YSQ927	F	I	92	104	220	220	290	326	256	256	134	158	396	422
12-GDYX	YSQ933	F	I	104	104	220	220	286	298	256	274	158	164	408	422
12-GDYX	YSQ934	F	I	104	104	220	220	322	322	256	256	158	164	422	422
12-GDYX	YSQ940	F	I	104	104	220	220	294	298	256	256	136	164	412	422
12-GDYX	YSQ941	F	I	104	104	220	220	294	322	268	274	158	164	366	422
12-GDYX	YSQ945	F	I	104	104	220	220	286	298	256	256	158	158	408	408
12-GDYX	YSQ947	F	I	104	104	220	220	?	?	256	256	158	158	398	422
12-GDYX	YSQ948	F	I	104	104	220	220	326	330	256	268	158	164	366	424
12-GDYX	YSQ949	F	I	104	104	220	220	?	?	256	268	134	134	422	422
12-GDYX	YSQ908	M	I	104	104	220	220	294	306	259	268	146	158	422	424
12-GDYX	YSQ909	M	I	104	104	220	220	294	302	274	274	120	164	372	424
12-GDYX	YSQ910	M	I	104	104	220	220	298	298	274	274	134	164	372	422
12-GDYX	YSQ911	M	I	104	104	220	220	302	326	268	268	134	158	364	364
12-GDYX	YSQ912	M	I	104	104	220	220	298	306	259	259	120	158	422	422
12-GDYX	YSQ915	M	I	104	104	220	220	302	302	259	259	134	134	390	390
12-GDYX	YSQ916	M	I	104	104	220	220	302	302	259	259	120	158	366	390
12-GDYX	YSQ918	M	I	104	107	220	220	290	298	256	256	136	136	390	422
12-GDYX	YSQ919	M	I	104	104	220	220	290	310	250	256	130	130	368	414
12-GDYX	YSQ920	M	I	104	104	220	220	314	338	256	256	158	158	394	394
12-GDYX	YSQ922	M	I	104	104	220	220	298	310	259	259	134	136	422	422
12-GDYX	YSQ923	M	I	104	104	220	220	286	302	253	271	132	142	370	420
12-GDYX	YSQ924	M	I	104	104	220	220	322	322	259	259	134	158	390	422
12-GDYX	YSQ926	M	I	104	104	220	220	298	298	256	256	136	136	388	422
12-GDYX	YSQ928	M	I	104	104	220	220	298	298	256	256	136	158	390	422
12-GDYX	YSQ929	M	I	104	104	220	220	314	318	274	274	164	164	366	422
12-GDYX	YSQ930	M	I	104	104	220	220	294	318	265	268	136	164	422	422
12-GDYX	YSQ931	M	I	104	104	220	220	314	314	256	256	136	136	390	412
12-GDYX	YSQ932	M	I	104	104	220	220	298	326	256	268	158	158	366	376
12-GDYX	YSQ935	M	I	104	104	220	220	306	306	256	256	158	158	390	422
12-GDYX	YSQ936	M	I	104	104	220	220	314	314	256	256	136	136	390	412
12-GDYX	YSQ937	M	I	104	104	220	220	298	298	256	256	134	134	390	394
12-GDYX	YSQ938	M	I	104	104	220	220	294	294	256	256	136	136	390	422
12-GDYX	YSQ939	M	I	104	104	220	220	290	290	256	256	134	134	422	422
12-GDYX	YSQ942	M	I	104	104	220	220	302	302	256	256	158	158	366	390
12-GDYX	YSQ943	M	I	104	104	220	220	?	?	256	256	136	136	390	422
12-GDYX	YSQ944	M	I	104	104	220	220	318	318	256	256	134	134	390	422
12-GDYX	YSQ946	M	I	107	107	220	220	?	?	259	259	158	158	366	390
13-HJSP	XM6625	F	I	104	107	220	220	298	302	262	265	134	134	380	422
13-HJSP	XM6630	F	I	104	104	220	220	294	294	262	262	134	172	422	422
13-HJSP	XM6631	F	I	104	104	214	220	326	326	265	265	134	134	422	422
13-HJSP	XM6633	F	I	104	113	220	220	290	306	265	265	134	134	372	422
13-HJSP	XM6636	F	I	92	104	214	220	326	326	262	265	134	134	380	422
13-HJSP	XM6637	F	I	104	104	220	220	286	294	268	268	120	176	372	378
13-HJSP	XM6638	F	I	104	104	220	220	286	322	265	268	134	172	422	426
13-HJSP	XM6639	F	I	104	104	220	220	286	302	265	265	134	134	380	422
13-HJSP	XM6640	F	I	104	104	220	220	322	322	262	268	134	134	422	422
13-HJSP	XM6641	F	I	104	104	214	220	386	386	265	277	158	166	372	422
13-HJSP	XM6642	F	I	104	104	220	220	294	318	268	268	158	164	422	430
13-HJSP	XM6643	F	I	104	104	220	220	322	338	265	271	134	134	422	426
13-HJSP	XM6644	F	I	98	104	214	220	294	294	265	268	134	164	388	388
13-HJSP	XM6645	F	I	92	98	220	220	290	290	265	265	134	134	372	392
13-HJSP	XM6646	F	I	104	104	220	220	274	326	262	265	172	172	372	422
13-HJSP	ZSJ062	F	I	104	107	220	220	302	306	268	274	158	158	372	422
13-HJSP	ZSJ065	F	I	104	104	220	220	314	314	259	259	158	164	428	428
13-HJSP	ZSJ066	F	I	98	104	220	220	302	314	268	271	142	142	372	388
13-HJSP	ZSJ070	F	I	104	104	220	220	302	302	259	265	134	134	372	428
13-HJSP	ZSJ072	F	I	104	104	214	214	318	318	265	268	154	164	394	422
13-HJSP	ZSJ075	F	I	104	104	220	220	314	314	265	268	164	164	372	372
13-HJSP	ZSJ076	F	I	104	104	220	220	?	?	259	268	164	164	428	428
13-HJSP	ZSJ082	F	I	98	104	220	220	314	314	265	274	158	166	372	422
13-HJSP	ZSJ083	F	I	104	104	220	220	326	326	268	292	158	158	372	422
13-HJSP	ZSJ084	F	I	104	104	220	220	314	314	268	268	164	164	372	372
13-HJSP	ZSJ089	F	I	92	104	220	220	?	?	268	268	120	142	372	426
13-HJSP	ZSJ090	F	I	104	104	220	220	?	?	265	265	134	158	372	422
13-HJSP	ZSJ101	F	I	104	104	220	220	314	314	265	268	158	176	372	422
13-HJSP	ZSJ102	F	I	104	104	220	220	302	314	268	268	164	164	372	372
13-HJSP	ZSJ104	F	I	104	104	220	220	306	326	265	265	134	134	372	422
13-HJSP	ZSJ105	F	I	104	107	220	220	298	302	259	289	158	158	422	428
13-HJSP	XM6629	M	I	92	104	214	220	294	306	262	268	134	134	374	422
13-HJSP	XM6632	M	I	98	107	214	220	294	294	265	268	134	134	372	372
13-HJSP	XM6634	M	I	98	107	214	220	294	294	265	268	134	134	372	372
13-HJSP	XM6635	M	I	92	104	214	220	302	302	268	268	120	142	372	374
13-HJSP	XM6647	M	I	92	104	214	220	306	306	262	268	134	134	374	422
13-HJSP	XM6648	M	I	92	104	214	220	290	306	268	268	134	134	374	374
13-HJSP	ZSJ061	M	I	104	104	220	220	298	302	268	268	158	158	372	374
13-HJSP	ZSJ063	M	I	92	104	220	220	310	310	268	289	?	?	374	422
13-HJSP	ZSJ064	M	I	104	104	220	220	310	310	265	268	134	134	372	374
13-HJSP	ZSJ067	M	I	104	107	220	220	?	?	265	268	?	?	374	422
13-HJSP	ZSJ068	M	I	104	104	220	220	314	314	268	268	164	164	374	374
13-HJSP	ZSJ069	M	I	104	107	220	220	?	?	268	271	120	158	372	374
13-HJSP	ZSJ071	M	I	104	104	220	220	314	314	259	268	142	158	374	378
13-HJSP	ZSJ073	M	I	104	107	220	220	290	310	265	268	120	120	374	422
13-HJSP	ZSJ074	M	I	104	104	220	220	?	?	268	268	120	158	374	394
13-HJSP	ZSJ077	M	I	104	104	220	220	?	?	268	283	120	158	374	374
13-HJSP	ZSJ078	M	I	98	104	220	220	318	318	265	268	142	142	374	424
13-HJSP	ZSJ079	M	I	104	104	220	220	?	?	268	289	120	158	374	422
13-HJSP	ZSJ080	M	I	104	104	220	220	?	?	268	268	?	?	374	394
13-HJSP	ZSJ081	M	I	104	104	220	220	?	?	268	268	120	158	372	374
13-HJSP	ZSJ085	M	I	92	98	214	220	318	318	268	268	134	134	374	422
13-HJSP	ZSJ086	M	I	92	104	214	220	290	310	268	268	120	142	374	426
13-HJSP	ZSJ087	M	I	92	104	214	220	306	306	268	268	134	134	374	422
13-HJSP	ZSJ088	M	I	92	104	214	220	298	310	268	268	134	134	374	422
13-HJSP	ZSJ103	M	I	104	104	220	220	?	?	265	268	134	134	372	374
13-HJSP	ZSJ106	M	I	104	104	220	220	318	318	265	268	120	158	374	392
14-BJHL	ZSJ094	F	I	92	104	220	220	?	?	268	274	134	174	372	422
14-BJHL	ZSJ095	F	I	92	92	220	220	366	366	268	274	134	134	364	364
14-BJHL	ZSJ096	F	I	104	104	220	220	330	338	268	274	134	166	388	422
14-BJHL	ZSJ098	F	I	92	92	220	220	314	366	274	274	134	134	364	372
14-BJHL	ZSJ099	F	I	104	104	220	220	302	302	268	268	134	158	388	426
14-BJHL	ZSJ107	F	I	104	107	220	220	302	302	274	274	158	158	424	424
14-BJHL	ZSJ108	F	I	92	104	220	220	302	314	274	274	134	134	364	372
14-BJHL	ZSJ111	F	I	92	92	220	220	314	314	268	274	134	158	364	424
14-BJHL	ZSJ112	F	I	104	104	220	220	302	302	268	268	134	134	372	426
14-BJHL	ZSJ116	F	I	104	107	220	220	302	302	268	274	134	158	372	424
14-BJHL	ZSJ117	F	I	104	104	220	220	302	306	268	274	134	158	420	424
14-BJHL	ZSJ123	F	I	92	92	220	220	330	330	274	274	134	134	364	364
14-BJHL	ZSJ124	F	I	104	104	220	220	338	338	271	277	158	164	422	424
14-BJHL	ZSJ125	F	I	104	104	220	220	302	302	271	271	136	158	422	424
14-BJHL	ZSJ126	F	I	104	104	220	220	314	314	256	274	136	136	364	364
14-BJHL	XM6612	M	I	92	104	220	220	282	322	256	268	164	164	422	422
14-BJHL	XM6613	M	I	92	104	220	220	278	282	268	268	134	134	362	364
14-BJHL	ZSJ091	M	I	104	104	220	220	318	318	256	274	134	158	364	422
14-BJHL	ZSJ092	M	I	92	92	220	220	314	314	268	274	134	158	364	372
14-BJHL	ZSJ093	M	I	92	92	220	220	282	314	250	268	134	158	362	420
14-BJHL	ZSJ097	M	I	104	104	220	220	286	302	268	274	158	158	422	424
14-BJHL	ZSJ100	M	I	104	107	220	220	314	314	268	268	134	134	422	424
14-BJHL	ZSJ109	M	I	104	107	220	220	298	338	268	274	134	158	422	424
14-BJHL	ZSJ110	M	I	104	104	211	211	302	302	268	274	158	166	366	424
14-BJHL	ZSJ113	M	I	104	107	220	220	282	338	277	277	134	164	422	422
14-BJHL	ZSJ114	M	I	104	107	220	220	302	302	268	274	134	158	422	424
14-BJHL	ZSJ115	M	I	104	107	220	220	330	334	274	283	134	158	364	424
14-BJHL	ZSJ121	M	I	92	107	220	220	314	314	268	268	134	134	422	424
14-BJHL	ZSJ122	M	I	104	107	220	220	310	330	268	268	134	134	362	364
14-BJHL	ZSJ127	M	I	107	107	220	220	306	306	268	268	134	158	422	426
15-TSCW	XM6532	F	I	104	104	220	220	326	330	253	268	134	156	370	370
15-TSCW	XM6542	F	I	104	104	220	223	310	310	253	259	134	158	364	370
15-TSCW	XM6547	F	I	104	104	220	220	298	306	277	277	134	134	370	370
15-TSCW	XM6552	F	I	104	104	220	220	290	306	259	268	134	158	364	370
15-TSCW	XM6559	F	I	104	107	220	220	294	302	253	259	134	134	364	370
15-TSCW	XM6561	F	I	104	104	220	220	302	302	253	268	138	158	370	370
15-TSCW	XM6563	F	I	104	104	220	220	318	318	253	259	134	134	364	370
15-TSCW	XM6565	F	I	104	104	220	220	326	330	253	268	142	142	370	370
15-TSCW	XM6566	F	I	104	104	220	220	294	302	253	259	134	134	364	370
15-TSCW	XM6567	F	I	104	104	220	223	298	326	253	268	142	158	370	370
15-TSCW	XM6568	F	I	104	104	220	220	294	326	253	253	142	158	370	370
15-TSCW	XM6569	F	I	104	104	220	220	326	330	253	277	134	134	364	370
15-TSCW	XM6572	F	I	104	104	220	220	322	330	253	268	142	158	370	370
15-TSCW	XM6573	F	I	104	104	220	220	302	302	253	268	158	158	370	370
15-TSCW	XM6577	F	I	104	104	208	220	326	330	253	277	134	134	364	370
15-TSCW	XM6580	F	I	104	104	220	220	302	330	253	259	120	134	364	370
15-TSCW	XM6581	F	I	104	104	220	220	314	318	277	277	134	134	364	364
15-TSCW	XM6586	F	I	104	104	220	220	306	314	277	277	134	142	364	370
15-TSCW	XM6593	F	I	104	104	220	220	298	314	253	259	134	158	364	372
15-TSCW	XM6597	F	I	104	104	220	220	298	298	253	253	120	142	370	372
15-TSCW	XM6598	F	I	104	104	220	220	298	298	256	256	134	142	370	370
15-TSCW	XM6599	F	I	104	104	220	220	298	302	277	277	134	134	364	418
15-TSCW	XM6600	F	I	104	104	220	223	298	322	253	259	134	134	370	418
15-TSCW	XM6601	F	I	104	104	208	220	306	330	253	253	120	128	370	426
15-TSCW	XM6602	F	I	104	104	220	220	314	322	253	259	134	158	364	370
15-TSCW	ZSJ053	F	I	104	104	220	220	318	318	259	259	134	158	364	364
15-TSCW	XM6541	M	I	107	107	220	223	326	326	271	280	146	158	370	370
15-TSCW	XM6543	M	I	104	104	220	220	310	310	253	259	134	158	364	370
15-TSCW	XM6544	M	I	104	107	220	220	306	306	277	277	134	158	364	364
15-TSCW	XM6545	M	I	104	107	220	220	326	326	253	253	142	142	370	370
15-TSCW	XM6546	M	I	104	107	220	220	310	310	253	262	134	134	370	370
15-TSCW	XM6548	M	I	104	107	220	220	326	326	253	253	142	158	370	370
15-TSCW	XM6549	M	I	104	107	220	220	310	310	253	277	134	134	364	364
15-TSCW	XM6550	M	I	104	107	220	220	330	330	277	277	134	134	364	364
15-TSCW	XM6551	M	I	104	107	220	220	302	314	253	253	142	142	370	370
15-TSCW	XM6553	M	I	104	104	220	223	302	302	253	262	134	134	370	370
15-TSCW	XM6554	M	I	107	107	220	220	302	318	253	262	134	134	370	370
15-TSCW	XM6558	M	I	104	107	220	220	302	302	253	268	158	158	370	370
15-TSCW	XM6560	M	I	104	107	220	220	310	310	253	253	134	158	370	370
15-TSCW	XM6564	M	I	104	107	220	220	302	318	253	268	142	158	370	370
15-TSCW	XM6570	M	I	104	107	220	220	290	290	253	262	134	134	370	370
15-TSCW	XM6571	M	I	104	107	220	220	314	314	253	259	134	134	364	364
15-TSCW	XM6574	M	I	104	107	220	223	326	326	253	268	158	158	370	370
15-TSCW	XM6575	M	I	104	107	220	220	294	294	253	268	134	158	364	364
15-TSCW	XM6576	M	I	104	107	220	220	310	310	253	253	120	142	370	370
15-TSCW	XM6578	M	I	104	107	220	220	326	326	253	253	120	158	370	370
15-TSCW	XM6579	M	I	107	107	220	220	290	290	253	253	120	142	364	364
15-TSCW	XM6582	M	I	104	107	220	220	322	322	253	253	120	142	370	370
15-TSCW	XM6583	M	I	104	107	220	220	322	322	253	253	120	142	370	370
15-TSCW	XM6584	M	I	104	107	220	220	294	294	253	277	134	142	364	364
15-TSCW	XM6585	M	I	104	107	220	220	326	326	256	256	120	134	370	370
15-TSCW	XM6587	M	I	101	101	211	217	306	306	253	253	120	158	370	370
15-TSCW	XM6594	M	I	104	107	220	220	306	306	256	256	134	142	370	370
15-TSCW	XM6595	M	I	98	98	223	223	306	306	256	256	120	148	420	420
15-TSCW	XM6596	M	I	98	98	223	223	294	334	256	256	120	148	420	420
15-TSCW	XM6603	M	I	104	107	220	223	306	306	253	253	146	158	426	426
15-TSCW	XM6604	M	I	104	107	220	220	294	294	253	253	120	158	370	370
16-XSGQ	QLY329	F	I	107	107	220	220	318	318	277	277	154	158	422	422
16-XSGQ	QLY330	F	I	104	107	220	220	318	322	268	277	154	158	422	422
16-XSGQ	QLY331	F	I	104	104	211	220	286	330	262	277	134	166	422	422
16-XSGQ	QLY334	F	I	104	107	220	220	318	322	277	277	156	158	422	422
16-XSGQ	QLY336	F	I	104	104	211	220	286	318	262	268	156	166	422	422
16-XSGQ	QLY338	F	I	107	107	220	220	318	318	277	277	158	158	422	422
16-XSGQ	QLY342	F	I	107	107	220	220	318	330	277	277	134	158	422	422
16-XSGQ	QLY343	F	I	104	104	211	220	286	322	262	277	158	166	422	422
16-XSGQ	QLY344	F	I	104	104	214	220	282	322	262	277	156	166	422	422
16-XSGQ	YSQ835	F	I	104	113	214	214	282	282	274	274	158	166	416	422
16-XSGQ	YSQ836	F	I	104	113	214	214	282	282	274	274	158	166	416	422
16-XSGQ	YSQ837	F	I	104	113	214	214	282	282	274	274	158	166	416	422
16-XSGQ	YSQ840	F	I	104	113	214	214	282	286	274	274	158	166	416	422
16-XSGQ	YSQ841	F	I	104	113	214	214	282	286	274	274	158	166	416	422
16-XSGQ	YSQ842	F	I	104	113	214	214	282	282	274	274	158	166	416	422
16-XSGQ	YSQ843	F	I	104	113	214	214	282	282	274	274	158	166	416	422
16-XSGQ	YSQ844	F	I	104	104	211	220	286	374	265	265	166	166	422	426
16-XSGQ	YSQ845	F	I	101	101	214	214	282	282	274	274	158	166	416	422
16-XSGQ	YSQ846	F	I	107	107	220	220	286	286	274	274	158	166	422	422
16-XSGQ	YSQ848	F	I	104	113	214	214	282	282	274	274	158	166	416	422
16-XSGQ	YSQ849	F	I	104	113	214	214	282	282	274	274	158	166	416	422
16-XSGQ	YSQ850	F	I	104	113	214	214	282	282	274	274	158	166	416	422
16-XSGQ	YSQ851	F	I	104	104	214	214	282	302	274	274	158	166	416	422
16-XSGQ	YSQ852	F	I	104	113	214	214	282	282	274	274	158	166	416	422
16-XSGQ	YSQ853	F	I	104	113	214	214	282	286	274	274	158	166	416	422
16-XSGQ	YSQ854	F	I	104	113	214	214	282	282	274	274	158	166	416	422
16-XSGQ	YSQ855	F	I	104	113	214	214	282	282	274	274	158	166	416	422
16-XSGQ	YSQ856	F	I	104	113	214	214	282	282	274	274	158	166	416	422
16-XSGQ	YSQ857	F	I	104	104	211	220	286	346	265	265	166	166	422	426
16-XSGQ	YSQ858	F	I	104	113	214	214	282	282	274	274	158	166	416	422
16-XSGQ	YSQ859	F	I	107	125	220	220	314	318	277	277	154	158	422	422
16-XSGQ	QLY332	M	I	104	104	220	220	330	366	265	265	158	166	422	426
16-XSGQ	QLY333	M	I	104	104	220	220	330	366	265	265	156	158	422	426
16-XSGQ	QLY335	M	I	104	104	220	220	314	366	265	265	156	158	422	426
16-XSGQ	QLY337	M	I	104	104	220	220	330	354	265	265	156	156	422	426
16-XSGQ	QLY341	M	I	104	104	220	220	318	366	265	265	158	158	422	426
16-XSGQ	YSQ861	M	I	104	104	220	220	318	382	265	265	156	156	422	426

## Sheet: autosomal loci
Population	Individual	Sex	Karyotype	SSR02-D56		SSR25-B12		QBb1		QBb5		QBb45
1-PZLMS	XM4273	F	IV	243	243	167	167	200	208	136	166	129	133
1-PZLMS	XM4274	M	V	243	243	167	171	200	204	136	158	133	141
1-PZLMS	XM4275	F	V	243	243	167	169	200	208	124	136	129	133
1-PZLMS	XM4276	F	V	243	243	167	167	200	208	124	136	129	133
1-PZLMS	XM4277	F	V	243	243	167	171	200	208	136	166	133	137
1-PZLMS	XM4278	M	I	243	246	169	171	200	212	124	162	137	141
1-PZLMS	XM4279	F	IV	?	?	?	?	200	200	136	166	133	133
1-PZLMS	XM4272	F	I	243	243	167	171	204	216	166	166	129	129
1-PZLMS	XM4282	M	I	243	243	171	171	204	212	124	124	113	141
1-PZLMS	XM5752	M	I	243	243	169	171	200	216	124	166	137	145
1-PZLMS	XM5753	F	II	243	243	167	171	204	208	136	166	129	131
1-PZLMS	XM5754	M	I	243	246	171	171	200	204	124	158	137	141
1-PZLMS	XM5755	F	II	243	243	167	171	200	204	136	166	?	?
1-PZLMS	XM5756	F	II	243	243	167	169	200	204	124	136	129	131
1-PZLMS	XM5757	M	I	243	243	169	171	200	204	158	162	141	141
1-PZLMS	XM5758	F	II	243	243	167	171	200	204	124	136	131	149
1-PZLMS	XM5759	M	I	243	243	171	171	200	216	162	166	133	137
1-PZLMS	XM5760	F	II	243	243	167	171	200	208	124	136	129	131
1-PZLMS	XM5761	F	IV	243	243	167	169	200	208	124	136	129	131
1-PZLMS	XM5762	F	I	243	243	171	171	192	200	124	124	?	?
1-PZLMS	XM5763	F	II	243	243	167	169	204	212	136	162	131	137
1-PZLMS	XM5764	M	I	243	243	169	171	200	216	124	166	133	137
1-PZLMS	XM5765	F	II	243	243	167	171	?	?	136	166	129	131
2-PZCF	XM4251	F	I	243	243	169	171	200	216	158	158	133	141
2-PZCF	XM2946	M	I	243	243	169	171	254	258	110	110	165	165
2-PZCF	XM2028	M	I	243	243	169	171	188	192	128	142	117	149
2-PZCF	XM2031	F	III	243	243	167	171	192	204	124	138	133	141
2-PZCF	XM2039	M	I	246	246	169	171	196	200	124	136	137	145
2-PZCF	XM2037	F	I	243	243	167	171	200	204	124	136	133	137
2-PZCF	XM2029	M	I	243	243	167	167	200	220	162	166	137	153
2-PZCF	XM2038	M	I	246	246	169	169	192	200	158	158	149	153
2-PZCF	XM4247	F	I	243	246	167	169	200	204	146	166	133	133
2-PZCF	XM4248	M	I	243	246	169	171	192	204	128	146	145	149
2-PZCF	XM4249	M	I	243	243	167	167	188	212	136	174	133	149
2-PZCF	XM4263	M	I	243	246	169	171	200	208	146	158	133	145
2-PZCF	XM4261	M	IV	243	246	167	167	196	208	136	150	137	145
2-PZCF	XM4262	M	I	243	246	167	169	200	204	128	154	133	149
2-PZCF	XM4259	F	II	243	246	167	171	200	204	136	150	133	149
2-PZCF	XM4252	M	I	243	246	167	171	208	212	146	162	129	137
2-PZCF	XM4253	M	I	243	246	169	171	200	208	142	158	129	133
2-PZCF	XM4254	M	I	243	243	169	171	200	208	142	162	137	149
2-PZCF	XM4255	M	I	243	243	167	167	208	208	146	158	129	137
2-PZCF	XM4256	M	I	243	246	169	171	208	212	142	162	129	141
2-PZCF	XM4257	M	I	243	246	167	171	208	208	124	162	129	137
2-PZCF	XM4258	M	I	243	243	169	171	192	192	124	154	141	145
2-PZCF	XM4260	F	I	243	246	167	169	208	212	124	158	137	145
2-PZCF	XM4283	M	I	243	243	169	171	196	196	?	?	141	145
2-PZCF	XM4295	F	IV	243	246	167	171	196	208	136	154	137	137
2-PZCF	XM4299	M	IV	243	246	167	171	196	208	124	136	137	157
2-PZCF	XM4301	F	IV	243	243	167	167	204	208	136	174	137	141
2-PZCF	XM4290	F	I	243	246	169	171	196	196	154	162	133	141
2-PZCF	XM4292	M	I	243	243	171	171	196	196	162	162	141	157
2-PZCF	XM4293	M	I	243	243	167	173	196	200	162	162	141	157
2-PZCF	XM4284	M	I	243	243	169	169	204	204	154	162	141	157
2-PZCF	XM4285	M	IV	243	243	167	169	200	208	124	136	137	157
2-PZCF	XM4288	M	IV	243	246	167	171	196	208	124	136	137	157
2-PZCF	XM4289	F	IV	243	243	167	167	200	208	136	162	129	137
2-PZCF	XM4291	F	I	243	246	171	171	196	196	124	162	137	141
3-QCS	XM3075	F	IV	243	246	167	169	?	?	136	142	137	141
3-QCS	XM3480	M	I	243	246	167	167	176	180	146	162	145	145
3-QCS	XM3482	F	IV	243	243	167	169	180	204	136	166	137	153
3-QCS	XM3483	M	IV	243	246	167	171	184	208	136	158	137	141
3-QCS	XM3484	F	I	246	246	171	171	168	176	154	170	141	145
3-QCS	XM3486	F	IV	243	246	167	171	176	208	158	158	137	157
3-QCS	XM2934	F	IV	243	246	167	169	?	?	136	146	137	141
3-QCS	XM2940	F	IV	243	246	167	169	172	212	136	158	133	141
3-QCS	XM3742	M	IV	243	246	167	169	196	224	136	166	137	137
3-QCS	XM3744	F	IV	243	246	167	169	196	220	166	166	137	145
3-QCS	XM3745	F	I	243	246	169	169	196	196	166	166	141	141
3-QCS	XM3746	F	IV	243	246	167	169	196	212	136	166	133	137
3-QCS	XM3747	F	IV	243	243	167	171	196	220	136	166	?	?
3-QCS	XM3749	F	IV	243	246	167	169	192	220	146	166	137	137
3-QCS	XM3743	F	IV	243	243	167	169	172	220	146	166	125	137
3-QCS	XM4238	M	IV	243	246	167	167	204	212	136	158	135	155
3-QCS	XM4239	F	IV	243	246	167	169	176	222	124	136	135	141
3-QCS	XM4242	F	III	243	246	167	167	204	212	136	170	137	145
3-QCS	XM4240	M	III	243	246	167	167	200	212	136	150	137	149
4-DYYEC	XM4201	F	IV	243	246	167	169	212	234	124	136	135	141
4-DYYEC	XM4202	M	IV	243	246	167	169	208	216	136	252	?	?
4-DYYEC	XM4203	F	IV	243	243	167	169	208	212	124	136	135	145
4-DYYEC	XM4205	F	IV	243	243	167	169	200	204	136	154	?	?
4-DYYEC	XM4209	M	IV	243	246	167	169	208	212	136	252	135	149
4-DYYEC	XM4213	F	IV	243	243	167	169	?	?	136	136	?	?
4-DYYEC	XM3712	M	I	243	243	169	169	200	204	134	162	153	173
4-DYYEC	XM3716	F	I	243	246	167	169	196	200	126	154	149	149
4-DYYEC	XM3768	F	I	246	246	167	169	196	204	124	146	141	145
4-DYYEC	XM3762	F	I	?	?	?	?	192	208	128	154	141	145
4-DYYEC	XM3764	M	IV	243	246	167	171	208	216	128	136	133	141
4-DYYEC	XM3765	M	I	243	246	171	171	192	196	154	154	149	149
4-DYYEC	XM3766	M	I	246	246	171	171	208	212	136	154	149	149
4-DYYEC	XM3767	F	IV	243	246	167	169	204	212	136	136	137	145
4-DYYEC	XM3763	F	IV	243	246	167	169	196	212	128	142	137	161
4-DYYEC	XM3757	F	I	246	246	169	169	216	216	154	154	141	165
4-DYYEC	XM3776	F	I	246	246	169	169	?	?	136	136	133	141
4-DYYEC	XM3756	M	I	243	246	171	171	208	220	128	150	137	181
4-DYYEC	XM3761	M	IV	243	246	167	171	?	?	136	136	137	181
4-DYYEC	XM3777	M	I	246	246	171	173	?	?	142	142	133	149
4-DYYEC	XM3759	F	IV	243	246	167	169	208	216	136	154	133	141
4-DYYEC	XM3758	F	I	246	246	167	169	196	204	140	154	133	149
4-DYYEC	XM3760	F	I	243	246	169	171	208	216	128	128	141	141
4-DYYEC	XM3771	F	I	246	246	167	169	?	?	142	158	145	157
4-DYYEC	XM3770	M	I	246	246	171	171	188	196	154	154	141	149
4-DYYEC	XM3769	F	IV	243	246	167	169	?	?	142	154	137	149
4-DYYEC	XM3778	F	I	246	246	169	169	192	200	136	136	141	141
4-DYYEC	XM3772	F	I	246	246	167	167	196	278	154	154	145	149
4-DYYEC	XM3773	F	I	246	246	169	169	188	192	124	158	141	157
4-DYYEC	XM3774	F	I	243	246	167	169	184	212	128	154	129	133
4-DYYEC	XM3775	F	I	243	246	167	169	208	212	136	136	145	145
4-DYYEC	XM3664	F	IV	243	246	171	171	204	212	136	136	137	145
4-DYYEC	XM3665	F	III	243	246	167	169	192	196	128	136	145	161
4-DYYEC	XM3666	F	IV	243	246	167	169	204	216	136	154	137	137
4-DYYEC	XM3667	F	IV	243	243	167	169	192	204	136	154	137	153
4-DYYEC	XM3668	F	I	246	246	167	169	208	220	128	158	141	145
4-DYYEC	XM3669	F	I	246	246	169	171	188	212	128	128	145	145
4-DYYEC	XM3670	F	IV	243	246	167	169	188	212	136	150	137	145
4-DYYEC	XM3671	F	I	246	246	169	171	208	216	128	158	141	145
4-DYYEC	XM3672	F	IV	243	246	167	169	188	208	136	154	133	153
4-DYYEC	XM3673	F	IV	243	246	167	169	196	208	136	136	133	153
4-DYYEC	XM3674	F	IV	243	246	167	169	196	208	136	136	133	153
4-DYYEC	XM3675	F	IV	243	243	167	169	196	208	136	154	133	141
4-DYYEC	XM3676	F	I	246	246	167	169	278	278	128	154	145	145
4-DYYEC	XM3677	F	I	243	246	167	169	196	196	124	158	145	153
4-DYYEC	XM3678	F	I	246	246	167	169	212	216	154	154	141	145
4-DYYEC	XM3679	F	I	246	246	169	171	216	220	154	154	145	153
4-DYYEC	XM3680	F	I	243	246	?	?	196	204	154	154	141	141
4-DYYEC	XM3681	F	IV	243	243	167	169	196	208	136	154	133	153
4-DYYEC	XM3682	F	I	246	246	169	169	184	220	154	154	149	165
4-DYYEC	XM3683	F	IV	243	246	167	167	196	212	136	154	137	149
4-DYYEC	XM3684	F	IV	243	246	167	171	204	208	136	154	133	149
4-DYYEC	XM3685	M	IV	243	246	167	169	204	220	136	150	137	137
4-DYYEC	XM3686	M	IV	243	246	167	169	208	224	136	150	133	149
4-DYYEC	XM3687	F	I	243	246	169	171	188	196	128	154	141	145
4-DYYEC	XM3688	M	I	246	246	169	171	196	208	130	130	141	141
4-DYYEC	XM3689	F	IV	243	246	167	169	184	212	126	138	137	145
4-DYYEC	XM3690	M	I	246	246	167	169	184	192	154	154	141	173
4-DYYEC	XM3691	M	IV	243	246	167	169	184	212	138	158	137	149
4-DYYEC	XM3692	M	I	243	246	167	169	192	204	154	154	145	149
4-DYYEC	XM4166	F	I	243	246	169	169	192	208	128	158	145	157
4-DYYEC	XM4167	F	I	246	246	169	169	192	204	128	158	141	145
4-DYYEC	XM4168	F	IV	243	246	167	169	204	212	128	136	135	153
4-DYYEC	XM4169	F	I	243	246	167	169	200	234	128	128	141	145
4-DYYEC	XM4171	F	IV	243	246	167	169	196	212	136	136	135	157
4-DYYEC	XM4179	F	I	246	246	169	169	200	212	154	162	145	157
4-DYYEC	XM4180	F	I	243	243	169	171	208	212	236	240	137	145
4-DYYEC	XM4157	F	IV	243	246	167	173	208	212	136	158	131	137
4-DYYEC	XM4159	M	I	243	246	169	171	212	218	158	158	145	149
4-DYYEC	XM4162	M	I	243	246	169	171	196	212	124	158	?	?
4-DYYEC	XM4165	M	I	246	246	167	169	192	212	154	158	145	149
4-DYYEC	XM4172	M	IV	?	?	?	?	200	204	128	136	?	?
4-DYYEC	XM4178	M	I	246	246	167	167	212	218	154	154	145	173
4-DYYEC	XM4163	F	IV	243	246	167	169	192	212	?	?	?	?
4-DYYEC	XM4181	F	IV	243	243	167	169	204	208	136	158	?	?
4-DYYEC	XM4158	F	I	246	246	169	169	212	218	154	162	145	157
4-DYYEC	XM4160	F	I	246	246	169	173	192	212	154	278	145	157
4-DYYEC	XM4194	F	I	243	246	169	171	208	212	154	158	?	?
4-DYYEC	XM4115	F	IV	243	243	167	171	196	204	136	136	137	145
4-DYYEC	XM4116	M	I	243	246	167	169	204	212	124	128	149	161
4-DYYEC	XM4117	M	I	243	246	167	173	200	212	124	142	149	161
4-DYYEC	XM4118	M	I	246	246	169	171	196	212	154	154	145	149
4-DYYEC	XM4119	F	I	243	246	169	169	212	216	142	162	141	149
4-DYYEC	XM4120	M	I	243	246	169	169	200	212	124	136	149	161
4-DYYEC	XM4121	M	IV	243	246	167	169	212	220	128	142	137	173
4-DYYEC	XM4122	M	I	243	246	169	169	208	212	124	128	145	149
4-DYYEC	XM4123	M	I	243	246	169	171	208	216	128	143	157	173
4-DYYEC	XM4124	F	IV	243	246	167	169	196	204	142	154	137	145
4-DYYEC	XM4125	F	IV	243	246	167	169	204	208	158	158	137	145
4-DYYEC	XM4126	F	I	246	246	167	169	192	212	128	154	157	161
4-DYYEC	XM4127	M	I	243	246	167	169	200	200	124	124	141	149
4-DYYEC	XM4128	M	I	243	246	167	171	212	216	128	128	145	173
4-DYYEC	XM4129	M	I	243	246	167	169	204	212	136	?	149	149
4-DYYEC	XM4130	M	I	243	246	169	171	216	216	124	128	141	141
4-DYYEC	XM4161	M	I	243	246	167	169	200	212	154	158	141	161
4-DYYEC	XM4164	M	I	243	246	167	169	196	234	128	128	145	153
4-DYYEC	XM4170	M	I	243	246	?	?	196	200	154	154	121	153
4-DYYEC	XM4173	M	I	243	243	167	169	196	200	128	262	145	157
4-DYYEC	XM4175	F	I	246	246	167	169	192	204	128	262	145	153
4-DYYEC	XM4177	M	IV	243	243	167	169	208	212	136	262	135	153
4-DYYEC	XM4176	M	I	246	246	169	169	196	200	128	154	153	157
4-DYYEC	XM4174	M	I	246	246	167	169	196	204	146	154	151	155
4-DYYEC	XM3750	F	I	243	246	169	169	188	208	128	154	137	153
4-DYYEC	XM3751	F	IV	243	243	167	169	188	204	142	154	137	141
4-DYYEC	XM3752	F	IV	243	243	167	169	188	208	136	136	133	153
4-DYYEC	XM3753	M	I	246	246	167	167	188	212	142	158	149	161
4-DYYEC	XM3754	F	I	246	246	169	171	184	212	154	154	141	145
4-DYYEC	XM3755	F	IV	243	243	167	169	192	204	154	154	129	133
5-DYGTS	XM3701	F	IV	243	246	167	171	204	204	138	138	141	145
5-DYGTS	XM3702	M	IV	243	246	167	169	200	204	138	142	145	157
5-DYGTS	XM3734	F	I	?	?	167	167	200	204	138	146	145	145
5-DYGTS	XM3733	F	IV	243	246	167	171	204	294	138	138	141	145
5-DYGTS	XM3634	F	IV	243	246	167	171	204	204	138	138	141	145
5-DYGTS	XM3635	F	IV	243	246	167	171	204	204	138	138	141	145
5-DYGTS	XM3636	F	IV	243	246	167	169	204	204	138	142	141	145
5-DYGTS	XM3637	F	IV	243	246	167	171	204	204	138	138	141	145
5-DYGTS	XM3638	F	IV	243	246	167	171	204	204	138	138	141	145
5-DYGTS	XM3639	M	IV	243	246	167	169	200	204	138	142	145	157
5-DYGTS	XM3633	M	IV	243	246	167	171	204	204	138	138	141	145
5-DYGTS	XM3632	F	IV	243	246	167	171	204	204	138	138	141	145
5-DYGTS	XM3631	F	IV	243	243	167	169	200	204	136	146	133	135
5-DYGTS	XM3383	M	IV	243	246	167	169	200	208	138	142	141	157
5-DYGTS	XM3385	M	IV	243	246	167	169	200	204	138	158	145	157
5-DYGTS	XM3007	F	IV	243	243	167	169	192	204	138	146	137	145
5-DYGTS	XM3008	F	IV	243	246	167	171	204	204	138	138	141	145
5-DYGTS	XM3382	F	IV	243	246	167	169	200	208	138	158	141	145
5-DYGTS	XM3384	F	IV	243	246	167	169	200	208	138	142	141	145
5-DYGTS	XM3629	F	IV	243	243	167	169	200	204	138	146	137	145
5-DYGTS	XM3649	F	IV	243	246	167	169	200	204	138	142	137	145
5-DYGTS	XM3650	F	IV	243	246	167	169	200	204	138	142	137	145
5-DYGTS	XM3662	M	IV	243	243	167	169	200	204	138	146	145	157
5-DYGTS	XM3630	M	IV	243	246	167	169	200	204	138	142	145	157
5-DYGTS	XM3641	F	IV	243	246	167	169	200	204	138	142	145	145
5-DYGTS	XM3642	F	IV	243	246	167	169	200	204	138	142	137	145
5-DYGTS	XM3640	M	IV	243	246	167	169	200	204	138	142	145	157
5-DYGTS	XM4057	F	I	246	246	169	169	294	298	136	166	141	141
5-DYGTS	XM4058	M	I	246	246	169	169	204	290	146	150	133	157
5-DYGTS	XM4096	F	IV	243	246	167	169	204	344	150	150	145	145
5-DYGTS	XM4065	F	IV	243	246	167	169	208	328	136	158	145	145
5-DYGTS	XM4066	F	IV	243	246	167	169	192	196	154	154	145	145
5-DYGTS	XM4067	F	IV	243	246	167	169	204	208	142	150	141	145
5-DYGTS	XM4061	F	IV	243	246	167	169	208	328	142	142	145	145
5-DYGTS	XM3517	F	I	246	246	169	169	208	290	124	154	145	145
5-DYGTS	XM3515	M	IV	243	243	167	169	200	216	142	142	141	141
5-DYGTS	XM3512	M	I	246	246	169	169	204	212	146	146	129	141
6-QLDZ	XM3973	F	I	243	246	167	171	200	204	146	166	133	149
6-QLDZ	XM3974	F	I	246	246	?	?	216	310	166	166	141	141
6-QLDZ	XM3977	F	I	243	246	167	167	184	200	146	166	133	141
6-QLDZ	XM3978	F	I	243	246	167	171	200	298	146	170	133	145
6-QLDZ	XM3979	F	I	243	246	167	169	200	208	146	166	133	145
6-QLDZ	XM3982	F	I	243	246	167	167	192	200	146	166	133	141
6-QLDZ	XM3905	F	I	243	246	167	167	192	200	146	154	133	141
6-QLDZ	XM3906	F	I	243	246	167	167	192	200	146	166	133	141
6-QLDZ	XM3907	F	I	243	246	167	167	200	204	146	166	?	?
6-QLDZ	XM3908	M	I	243	246	167	169	180	200	146	166	133	153
6-QLDZ	XM3909	F	I	243	246	167	167	200	216	146	154	133	137
6-QLDZ	XM3910	M	I	246	246	169	169	188	204	138	166	149	149
6-QLDZ	XM3911	F	I	243	246	167	169	188	200	146	166	133	141
6-QLDZ	XM3912	F	I	243	246	167	167	200	216	146	166	133	141
6-QLDZ	XM3914	F	I	243	246	167	169	200	204	146	154	133	141
6-QLDZ	XM3916	F	I	243	246	167	167	200	216	146	166	133	141
6-QLDZ	XM3918	F	I	243	246	167	167	200	216	146	154	?	?
6-QLDZ	XM3919	F	I	243	246	167	167	192	200	146	166	133	141
6-QLDZ	XM3920	F	I	243	246	167	169	200	204	146	166	133	149
6-QLDZ	XM3921	F	I	243	246	167	169	200	204	146	166	133	149
6-QLDZ	XM3922	F	I	243	246	167	167	184	200	146	154	133	141
6-QLDZ	XM3926	F	I	243	246	167	169	192	200	146	166	133	145
6-QLDZ	XM3928	F	I	246	246	169	169	192	192	162	166	141	141
6-QLDZ	XM3929	F	I	243	246	167	167	200	204	146	166	133	141
6-QLDZ	XM3932	F	I	243	246	167	167	192	200	146	166	133	141
6-QLDZ	XM3951	M	I	246	246	167	169	192	192	166	166	145	149
6-QLDZ	XM3952	F	I	243	246	167	171	200	204	146	166	133	149
6-QLDZ	XM3953	F	I	246	246	167	169	298	298	162	166	141	145
6-QLDZ	XM3954	F	I	243	246	167	169	200	204	146	166	133	149
6-QLDZ	XM3959	F	I	243	246	167	169	200	204	146	166	133	149
6-QLDZ	XM3971	M	I	246	246	169	171	204	298	162	166	145	149
6-QLDZ	XM3972	M	I	246	246	169	171	200	204	142	142	149	149
6-QLDZ	XM3975	M	I	246	246	167	169	204	298	142	166	149	149
6-QLDZ	XM3980	F	I	246	246	167	169	204	204	166	166	145	149
6-QLDZ	XM3984	F	I	246	246	167	169	204	204	142	166	149	153
6-QLDZ	XM3985	F	I	243	246	167	169	192	200	146	166	133	145
6-QLDZ	XM3986	F	I	246	246	167	169	192	298	158	170	145	145
6-QLDZ	XM3987	F	I	243	246	167	169	200	204	162	166	149	149
6-QLDZ	XM3965	F	I	243	246	167	169	200	200	146	158	133	145
6-QLDZ	XM3967	M	I	246	246	169	169	204	204	158	158	149	149
6-QLDZ	XM3966	F	I	243	246	167	169	200	204	146	166	133	141
6-QLDZ	XM3968	F	I	246	246	169	169	204	204	158	166	145	149
6-QLDZ	XM3969	F	I	246	246	169	169	200	204	158	162	145	149
6-QLDZ	XM3976	F	I	246	246	169	169	192	298	162	166	145	145
6-QLDZ	XM3948	M	I	246	246	167	169	228	290	166	166	141	145
6-QLDZ	XM3964	M	IV	243	246	167	169	200	208	124	146	137	141
6-QLDZ	XM4017	F	I	246	246	169	171	228	298	142	146	133	141
6-QLDZ	XM4018	F	I	246	246	167	169	212	228	142	158	137	141
7-QLTTS	XM3988	F	I	246	246	167	169	176	232	154	154	133	133
7-QLTTS	XM3989	F	I	246	246	167	169	208	216	158	166	133	141
7-QLTTS	XM3990	F	I	246	246	169	169	196	?	154	158	133	141
7-QLTTS	XM3992	F	I	243	246	167	167	196	204	146	158	133	137
7-QLTTS	XM3993	M	I	246	246	167	169	?	306	158	174	133	137
7-QLTTS	XM3994	F	I	246	246	167	169	306	306	154	174	133	133
7-QLTTS	XM3995	M	I	246	246	167	169	286	286	128	158	133	137
7-QLTTS	XM3996	F	I	246	246	167	169	232	318	158	174	137	141
7-QLTTS	XM3627	M	I	243	246	167	169	192	200	146	170	129	133
7-QLTTS	XM3626	F	I	246	246	169	169	284	306	146	178	129	137
7-QLTTS	QLY380	M	I	246	246	169	171	286	298	150	150	129	137
7-QLTTS	QLY384	M	I	246	246	171	175	302	302	158	158	133	133
7-QLTTS	QLY382	M	I	246	246	169	175	286	302	158	170	129	133
7-QLTTS	XM3590	F	V	243	246	167	175	208	294	146	158	133	137
7-QLTTS	XM3591	F	I	246	246	169	171	176	180	166	170	125	141
7-QLTTS	XM3614	M	I	246	246	169	171	180	216	166	170	125	133
7-QLTTS	XM3616	M	I	246	246	167	169	200	256	128	128	137	145
7-QLTTS	XM3618	M	I	246	246	169	171	208	208	166	170	133	149
7-QLTTS	XM3622	F	I	246	246	169	169	180	180	158	170	133	137
7-QLTTS	XM3624	F	I	243	246	167	171	188	212	146	146	129	133
7-QLTTS	XM3615	M	I	246	246	169	169	180	216	170	170	133	141
7-QLTTS	XM3617	M	I	246	246	169	169	180	294	154	170	133	145
7-QLTTS	XM4146	M	III	243	246	167	169	204	208	146	158	133	135
7-QLTTS	QLY385	F	V	243	246	167	167	192	208	146	154	133	137
7-QLTTS	QLY386	F	I	243	246	167	169	188	212	146	170	133	145
7-QLTTS	QLY387	F	V	243	246	167	173	208	294	146	158	137	137
7-QLTTS	QLY388	F	I	243	246	167	169	180	208	146	166	129	137
7-QLTTS	QLY379	F	I	246	246	169	169	160	216	146	170	141	145
7-QLTTS	QLY392	F	V	243	246	167	169	208	212	146	146	133	137
7-QLTTS	XM3625	F	II	243	246	167	169	208	294	146	146	137	137
7-QLTTS	QLY389	M	I	246	246	169	169	200	302	146	158	129	133
7-QLTTS	QLY390	F	I	246	246	169	169	200	200	154	166	137	141
7-QLTTS	QLY391	F	I	246	246	169	169	200	200	150	?	125	145
7-QLTTS	XM3599	F	I	246	246	169	169	200	200	158	166	125	145
7-QLTTS	XM4149	F	II	246	246	169	169	212	294	154	162	133	137
7-QLTTS	XM4152	F	II	243	246	167	169	196	212	146	170	131	137
7-QLTTS	XM4153	F	II	243	246	167	169	?	?	146	166	?	?
7-QLTTS	XM4154	F	II	243	246	167	169	180	204	146	170	127	137
7-QLTTS	XM4150	M	I	246	246	169	169	180	208	154	166	141	145
7-QLTTS	XM4151	F	I	243	246	167	173	204	262	146	162	127	137
7-QLTTS	XM3960	F	I	246	246	167	169	180	180	150	162	141	149
7-QLTTS	XM3955	F	I	246	246	167	169	180	282	162	162	141	145
7-QLTTS	XM3956	F	I	246	246	167	169	180	282	158	162	133	145
7-QLTTS	XM3957	F	I	243	246	167	169	200	282	146	158	133	141
7-QLTTS	XM3938	M	I	246	246	169	171	180	180	158	158	141	145
7-QLTTS	XM3939	F	I	243	246	167	167	176	204	146	170	133	153
7-QLTTS	XM3940	F	I	246	246	167	169	180	180	154	158	141	145
7-QLTTS	XM3941	M	I	246	246	169	169	216	282	158	162	145	149
7-QLTTS	XM3942	M	I	246	246	167	169	282	302	158	162	145	149
7-QLTTS	XM3943	M	I	246	246	167	169	180	286	162	162	145	149
7-QLTTS	XM3944	F	I	243	246	167	167	192	200	146	170	133	153
7-QLTTS	XM3945	M	I	246	246	167	169	310	310	158	166	141	145
7-QLTTS	XM3946	F	I	243	246	167	169	200	208	146	158	133	141
7-QLTTS	XM3947	F	I	246	246	169	171	180	286	158	162	141	141
7-QLTTS	XM3962	M	I	246	246	167	169	180	180	150	162	141	145
8-EMPX	XM3879	F	I	243	243	169	173	176	196	154	154	125	145
8-EMPX	XM3880	F	I	243	243	169	181	176	188	142	146	129	137
8-EMPX	XM3881	F	I	243	243	169	173	176	192	120	120	125	137
8-EMPX	XM3882	F	I	243	243	169	181	176	192	120	142	129	145
8-EMPX	XM3883	F	I	243	243	169	173	176	180	150	150	125	141
8-EMPX	XM3884	F	I	243	246	169	181	188	204	142	150	129	157
8-EMPX	XM3885	F	I	243	243	169	181	172	188	120	142	129	141
8-EMPX	XM3886	F	I	243	246	169	181	188	196	142	146	129	145
8-EMPX	XM3887	F	I	246	246	169	169	204	204	120	146	137	149
8-EMPX	XM3888	F	I	243	246	169	181	188	200	120	142	129	141
8-EMPX	XM3080	F	I	246	246	169	169	208	208	130	150	141	141
8-EMPX	XM3319	M	I	243	246	167	169	208	212	124	124	137	197
8-EMPX	XM3320	M	I	243	243	169	169	200	204	150	158	137	161
8-EMPX	XM1979	M	I	246	246	169	169	196	212	150	154	137	157
8-EMPX	XM1971	M	I	243	246	167	169	192	208	142	150	145	165
8-EMPX	XM3808	F	I	243	246	169	173	180	200	142	146	129	133
8-EMPX	XM3809	F	I	243	243	169	173	180	200	120	120	129	137
8-EMPX	XM3810	M	I	243	243	169	173	180	200	142	166	133	145
8-EMPX	XM3811	M	I	246	246	169	169	196	204	158	162	145	181
8-EMPX	XM3812	F	I	243	243	169	173	180	208	150	150	133	137
8-EMPX	XM3813	F	I	243	243	169	173	180	208	142	150	133	137
8-EMPX	XM3814	F	I	243	246	169	169	196	212	120	120	133	141
8-EMPX	XM3815	M	I	243	243	169	173	180	200	?	?	137	185
8-EMPX	XM3799	F	I	243	243	169	169	204	204	120	120	137	137
8-EMPX	XM3800	F	I	243	246	169	173	180	200	146	146	133	133
8-EMPX	XM3801	M	I	243	246	169	169	200	212	120	146	145	165
8-EMPX	XM3802	M	I	243	246	169	169	200	216	120	146	133	185
8-EMPX	XM3803	F	I	243	243	169	173	176	204	124	124	133	141
8-EMPX	XM3804	F	I	243	246	169	173	180	208	146	146	133	133
8-EMPX	XM3805	M	I	243	246	169	169	204	204	146	162	145	185
8-EMPX	XM3806	M	I	243	246	169	169	212	216	146	146	137	173
8-EMPX	XM4025	M	I	?	?	?	?	228	298	142	154	129	133
8-EMPX	XM3937	F	IV	243	243	167	169	200	208	124	136	129	133
8-EMPX	XM3081	F	I	243	243	169	169	204	204	150	154	137	141
8-EMPX	XM3084	F	I	243	246	169	169	208	208	154	158	137	149
8-EMPX	XM3371	F	I	243	243	169	173	180	208	150	150	129	141
8-EMPX	XM3080	F	I	246	246	169	169	208	208	130	150	141	141
8-EMPX	XM3735	F	I	243	243	169	169	176	208	150	154	149	149
8-EMPX	XM3073	F	I	243	246	169	173	176	208	122	122	129	145
8-EMPX	XM3074	F	I	243	246	169	181	180	188	142	154	129	133

## Sheet: COI and cyt b sequences
Population	Individual	Sex	Karyotype	COI	cyt b	Haplotype
1-PZLMS	XM5753	F	II	MH029851		H33
1-PZLMS	XM5754	M	I	MH029852		H33
1-PZLMS	XM5755	F	II	MH029853		H33
1-PZLMS	XM5762	F	I	MH029854		H33
1-PZLMS	XM4272	F	I	MH428093		H33
1-PZLMS	XM4273	F	IV	KX571607	KX571758	H37
1-PZLMS	XM4274	M	V	KX571608	KX571759	H37
1-PZLMS	XM4275	F	V	KX571609	KX571760	H37
1-PZLMS	XM4276	F	V	KX571610	KX571761	H37
1-PZLMS	XM4277	F	V	KX571611	KX571762	H37
1-PZLMS	XM4278	M	I	KX571612	KX571763	H37
1-PZLMS	XM4279	F	IV	KX571613	KX571764	H37
1-PZLMS	XM4280	F	V	KX571614		H33
1-PZLMS	XM4281	F	II	KX571615	KX571765	H37
1-PZLMS	XM4282	M	I	KX571616	KX571766	H37
2-PZCF	XM4283	M	I	KX571617		H33
2-PZCF	XM4284	M	I	KX571618	KX571767	H38
2-PZCF	XM4285	M	IV	KX571619	KX571768	H28
2-PZCF	XM4288	M	IV	KX571620	KX571769	H28
2-PZCF	XM4289	F	IV	MH029850		H21
3-QCS	XM2029	M	I	JX629605	KX571755	H30
3-QCS	XM2031	F	III	JX629604		H33
3-QCS	XM2037	F	I	JX629606	KX571756	H34
3-QCS	XM2038	M	I	JX629607		H21
3-QCS	XM2039	M	I	JX629608		H21
3-QCS	XM2926	F	I	JX629643		H21
3-QCS	XM2928	F	I	JX629644	KX571757	H28
3-QCS	XM2946	M	I	JX629609		H21
3-QCS	XM2961	M	I	JX629610		H35
3-QCS	XM3076	F	I	JX629638		H21
3-QCS	XM3742	M	IV	KX571601	KX571745	H28
3-QCS	XM3743	F	IV	MH428094		H21
3-QCS	XM3744	F	IV	KX571602	KX571746	H28
3-QCS	XM3745	F	I	KX571603	KX571747	H28
3-QCS	XM3746	F	IV	KX571604	KX571748	H28
3-QCS	XM3747	F	IV	KX571605	KX571749	H42
3-QCS	XM3749	F	IV	KX571606	KX571750	H28
3-QCS	XM3480	M	I	JX629639		H21
3-QCS	XM3481	M	I	JX629636	KX571751	H28
3-QCS	XM3482	F	IV	JX629637	KX571752	H28
3-QCS	XM3483	M	IV	JX629640	KX571753	H28
3-QCS	XM3484	F	I	JX629641	KX571754	H28
3-QCS	XM3485	F	I	JX629642		H21
4-DYYEC	XM3664	F	IV	MH029840		H21
4-DYYEC	XM3681	F	IV	MH029841		H21
4-DYYEC	XM3687	F	I	MH029847		H21
4-DYYEC	XM4058	M	I	MH428058		H50
4-DYYEC	XM4059	M	I	MH428059		H21
4-DYYEC	XM4063	F	IV	MH428060		H21
4-DYYEC	XM4064	F	IV	MH428061		H21
4-DYYEC	XM4065	F	IV	MH428062		H21
4-DYYEC	XM4066	F	IV	MH428063		H21
4-DYYEC	XM4067	F	IV	MH428064		H21
4-DYYEC	XM4068	M	I	MH428065		H21
4-DYYEC	XM3781	M	IV	MH428066		H21
4-DYYEC	XM3782	M	I	MH428067		H21
4-DYYEC	XM3783	F	I	MH428068		H21
4-DYYEC	XM3784	F	I	MH428069		H21
4-DYYEC	XM3785	F	I	MH428070		H21
4-DYYEC	XM3786	M	I	MH428071		H21
4-DYYEC	XM3787	M	I	MH428072		H21
4-DYYEC	XM3788	M	I	MH428073		H21
4-DYYEC	XM4085	F	I	MH428074		H21
4-DYYEC	XM4086	F	I	MH428075		H21
4-DYYEC	XM4087	M	I	MH428076		H21
4-DYYEC	XM4088	M	I	MH428077		H21
4-DYYEC	XM4089	F	I	MH428078		H21
4-DYYEC	XM4090	M	I	MH428079		H21
4-DYYEC	XM4091	F	I	MH428080		H21
4-DYYEC	XM4092	F	I	MH428081		H21
4-DYYEC	XM4079	F	I	MH428082		H21
4-DYYEC	XM4121	M	IV	MH029842		H21
4-DYYEC	XM4122	M	I	MH029849		H21
4-DYYEC	XM4158	F	I	MH029846		H21
4-DYYEC	XM4159	M	I	MH029844		H21
4-DYYEC	XM4174	M	I	MH029845		H21
4-DYYEC	XM4167	F	I	MH029848		H21
4-DYYEC	XM4177	M	IV	MH029843		H21
5-DYGTS	XM3007	F	IV	JX629599	KX571736	H28
5-DYGTS	XM3008	F	IV	JX629598		H29
5-DYGTS	XM3028	M	IV	JX629600	KX571737	H30
5-DYGTS	XM3382	F	IV	JX629601	KX571738	H28
5-DYGTS	XM3384	F	IV	JX629602		H21
5-DYGTS	XM3385	M	IV	JX629603	KX571739	H28
5-DYGTS	XM3512	M	I	JX629656		H21
5-DYGTS	XM3515	M	IV	JX629657	KX571740	H28
5-DYGTS	XM3516	M	I	JX629658	KX571741	H28
5-DYGTS	XM3517	F	I	JX629661		H31
5-DYGTS	XM3518	M	I	JX629662		H21
5-DYGTS	XM3525	F	I	JX629663		H21
5-DYGTS	XM3526	M	I	JX629655		H21
5-DYGTS	XM3527	M	I	JX629659	KX571742	H28
5-DYGTS	XM3528	F	I	JX629660	KX571743	H32
5-DYGTS	XM3662	M	IV	MH029839		H21
5-DYGTS	XM3779	F	I	KX571599		H21
5-DYGTS	XM3780	F	I	KX571600		H21
6-QLDZ	XM3910	M	I	MH029838		H21
6-QLDZ	XM4039	M	I	MH428083		H21
6-QLDZ	XM4040	F	I	MH428084		H21
6-QLDZ	XM4041	M	I	MH428085		H21
6-QLDZ	XM4042	F	I	MH428086		H21
6-QLDZ	XM4043	M	I	MH428087		H21
6-QLDZ	XM4044	M	I	MH428088		H21
6-QLDZ	XM4045	F	I	MH428089		H21
6-QLDZ	XM4046	M	I	MH428090		H21
6-QLDZ	XM4047	F	I	MH428091		H21
6-QLDZ	XM4048	M	I	MH428092		H21
7-QLTTS	QLY377	M	I	JX629654		H21
7-QLTTS	QLY378	F	I	JX629612		H21
7-QLTTS	QLY387	F	V	MH029835		H33
7-QLTTS	QLY390	F	I	JX629591		H21
7-QLTTS	QLY391	F	I	JX629590	KX571722	H39
7-QLTTS	QLY392	F	V	JX629620		H21
7-QLTTS	XM3570	F	I	JX629572		H21
7-QLTTS	XM3571	M	I	JX629574	KX571720	H43
7-QLTTS	XM3573	F	I	JX629575		H21
7-QLTTS	XM3574	F	I	JX629576		H21
7-QLTTS	XM3575	F	I	JX629577	KX571721	H43
7-QLTTS	XM3580	M	I	JX629573		H21
7-QLTTS	XM3582	F	I	JX629578		H21
7-QLTTS	XM3583	M	I	JX629579		H21
7-QLTTS	XM3590	F	V	JX629613		H33
7-QLTTS	XM3591	F	I	JX629614		H21
7-QLTTS	XM3598	F	I	JX629586	KX571723	H28
7-QLTTS	XM3599	F	I	JX629587		H21
7-QLTTS	XM3600	F	I	JX629588		H21
7-QLTTS	XM3602	M	I	JX629589		H21
7-QLTTS	XM3603	M	I	JX629615		H21
7-QLTTS	XM3617	M	I	JX629616		H21
7-QLTTS	XM3619	M	IV	JX629617	KX571724	H40
7-QLTTS	XM3623	F	IV	JX629618	KX571726	H40
7-QLTTS	XM3625	F	II	JX629619	KX571727	H28
7-QLTTS	XM3643	F	II	JX629634	KX571728	H41
7-QLTTS	XM3644	F	II	JX629635	KX571729	H41
7-QLTTS	XM4149	F	II	MH029836		H21
7-QLTTS	XM4146	M	III	MH029837		H33
8-EMPX	XM1934	F	I	JX629592		H21
8-EMPX	XM1971	M	I	JX629593		H21
8-EMPX	XM1979	M	I	JX629594		H21
8-EMPX	XM3062	M	I	JX629595		H33
8-EMPX	XM3063	F	I	JX629596		H21
8-EMPX	XM3074	F	I	JX629597	KX571744	H36
9-DGTX	XM3891	M	I	MH428095		H51
9-DGTX	XM3892	F	I	MH428096		H51
9-DGTX	XM3893	F	I	KX571665	KX571825	H44
9-DGTX	XM3894	M	I	KX571666	KX571826	H44
9-DGTX	XM3895	M	I	KX571667	KX571827	H45
9-DGTX	XM3896	F	I	KX571668	KX571828	H44
9-DGTX	XM3897	F	I	KX571669	KX571829	H46
9-DGTX	XM3898	F	I	MH428097		H51
9-DGTX	XM3899	F	I	MH428098		H51
9-DGTX	XM3902	F	I	MH428099		H51
10-SYKKS	XM3392	F	I	JX629621	KX571831	H5
10-SYKKS	XM3393	M	I	JX629623	KX571832	H5
10-SYKKS	XM3395	F	I	JX629624	KX571833	H6
10-SYKKS	XM3396	M	I	JX629625	KX571834	H7
10-SYKKS	XM3397	M	I	JX629626	KX571835	H8
10-SYKKS	XM3398	F	I	JX629627	KX571836	H9
10-SYKKS	XM3399	F	I	JX629628	KX571837	H7
10-SYKKS	XM3400	M	I	JX629629	KX571838	H10
10-SYKKS	XM3401	M	I	JX629630	KX571839	H6
10-SYKKS	XM3402	M	I	JX629622	KX571840	H11
10-SYKKS	XM3403	M	I	KX571672	KX571841	H8
10-SYKKS	XM3404	F	I	KX571673	KX571842	H8
10-SYKKS	XM3405	F	I	KX571674	KX571843	H11
10-SYKKS	XM3406	M	I	KX571675	KX571844	H12
10-SYKKS	XM3407	M	I	KX571676	KX571845	H10
10-SYKKS	XM3408	M	I	KX571677	KX571846	H12
10-SYKKS	XM3409	M	I	KX571678	KX571847	H5
10-SYKKS	XM3410	M	I	KX571679		H13
10-SYKKS	XM3416	M	I	KX571680		H14
10-SYKKS	XM3418	M	I	KX571681	KX571848	H7
12-GDYX	IOZCAS2757		I	KX571682	KX571849	H1
12-GDYX	Leishan14		I	KX571683	KX571850	H2
12-GDYX	Leishan21		I	KX571684	KX571852	H3
12-GDYX	Leishan22		I	KX571685	KX571853	H3
12-GDYX	XY64		I	JX629631	KX571856	H1
12-GDYX	XM3389	M	I	JX629632	KX571854	H1
12-GDYX	XM3390	F	I	JX629633	KX571855	H4
13-HJSP	XM3538	M	I	JX629645		H22
13-HJSP	XM3544	F	I	JX629647	KX571873	H23
13-HJSP	XM3545	M	I	JX629648	KX571874	H23
13-HJSP	XM3546	M	I	JX629649		H22
13-HJSP	XM3548	M	I	JX629650		H24
13-HJSP	XM3549	F	I	JX629651		H24
13-HJSP	XM3550	F	I	JX629652		H24
13-HJSP	XM3551	F	I	JX629653		H24
13-HJSP	XM3552	F	I	JX629646	KX571875	H23
13-HJSP	XM3553	F	I	KX571696	KX571876	H25
13-HJSP	XM3554	F	I	KX571697	KX571877	H25
13-HJSP	XM3555	F	I	KX571698	KX571878	H26
13-HJSP	XM3556	F	I	KX571699	KX571879	H23
13-HJSP	XM3557	M	I	KX571700	KX571880	H27
13-HJSP	XM3558	F	I	KX571701	KX571881	H25
14-BJHL	XM3164	F	I	JX629666	KX571860	H47
14-BJHL	XM3173	M	I	JX629667		H48
14-BJHL	XM3176	M	I	JX629664	KX571861	H49
14-BJHL	XM3181	F	I	JX629665	KX571862	H49
16-XSGQ	QLY335	M	I	KX571707		H15
16-XSGQ	QLY341	M	I	KX571708	KX571888	H16
16-XSGQ	QLY342	F	I	KX571709	KX571889	H16
16-XSGQ	QLY343	F	I	KX571710	KX571890	H16
16-XSGQ	QLY344	F	I	KX571711	KX571891	H15
16-XSGQ	XM3559	M	I	JX629580		H17
16-XSGQ	XM3560	M	I	JX629581	KX571895	H18
16-XSGQ	XM3562	M	I	JX629582	KX571896	H19
16-XSGQ	XM3564	F	I	JX629583	KX571897	H16
16-XSGQ	XM3565	M	I	JX629584	KX571898	H20
16-XSGQ	XM3566	F	I	JX629585		H21
16-XSGQ	XM3567	M	I	KX571714		H17
16-XSGQ	XM3568	F	I	KX571715		H17
16-XSGQ	XM3569	F	I	KX571716		H17
